# Supplementary material for: Retrotransposons are specified as DNA replication origins in the gene-poor regions of Arabidopsis heterochromatin
Source: Oxford University Press journal article supplement (doi:10.1093/nar/gkx524), 2017-06-06
Supplement: gkx524_supp.zip [file gkx524_supp.zip]

Archive with 2 entries (2 files):
- nar-00219-z-2017-File007.pdf
- nar-00219-z-2017-File008.xlsx
