# Supplementary material for: Retrotransposons are specified as DNA replication origins in the gene-poor regions of Arabidopsis heterochromatin
Source: Oxford University Press journal article supplement (doi:10.1093/nar/gkx524), 2017-06-06
Supplement: gkx524_supp.zip [file gkx524_supp.zip › nar-00219-z-2017-File007.pdf]

## Supplementary methods

To characterize the nature of our sequencing data (GEO GSE2182; (1)) we studied the distribution of the coverage using a kernel density estimation (KDE), also termed the *Parzen-Rosenblatt window* method (2,3), with a gaussian kernel. First, we assigned to each nucleotide of the genome its corresponding coverage. Then, we divided the genome in windows with different bin size from 100 nt to 10,000 nt and calculated the coverage normalized against the size of the window, thus coverage level do not depend on window size but on read enrichment. After that, we calculated the kernel density estimation. Supplementary Figure S1 shows that KDE of the coverage using small window bin size (100 or 300 nt), reflects mostly genomic sites not enriched in the BrdU-reads, meaning that bin size is not large enough to discriminate the BrdU-enriched sites. Increasing the window bin size (700 or 900 nt) allows distinguishing the regions enriched in BrdU-reads from those with a low coverage as a crest in the density distribution. The largest windows (5,000 or 10,000 nt) do not detect any zones enriched in BrdU-reads, suggesting that the sites with more BrdU-reads are smaller than the window bin size. These results point to a distribution of the reads around peaks of 700-900 nt and ruled out the possibility of frequent large zones enriched in the sequenced reads.

There is a large variety of peak-calling algorithms designed to identify peaks out of sequencing reads. They use different parameters, algorithms and normalizations, but the results differ basically in the number and width of the peaks returned. The aim of the present study was to identify ORIs in the heterochromatic regions of the Arabidopsis genome for which we did not have any previous information on their number and nature, although our KDE analysis suggested that most peaks should not be very large in size. In any case, we used and compared several peak-calling algorithms developed to identify sharp or broader peaks, namely: MACS (versions 1.4 and 2.0; (4)), BayesPeak (5), Homer (6), SICER (7) and T-PIC (8). We found that the peak size distribution in each case showed, at the most, a 2-4-fold difference in the mean value (Supplementary Fig. S2A), which ranged between 537 nt in the case of MACS2.0 to 1232 nt for T-PIC. This indicated that the peak size does not change dramatically with different algorithms and is relatively small, consistent with the compact organization and small size of the Arabidopsis genome. Interestingly, the median of the medians for the six peak-calling algorithms evaluated corresponds to the window bin size of the KDE in which a crest of the density distribution was observed (700-900 nt). Thus, the vast majority of ORIs corresponds to discrete initiation sites rather than to large initiation zones. Furthermore, independently of the algorithm used, the peak size in peri- and non-pericentromeric regions was very similar, in each case (Supplementary Figure S2A). Measurement of the interorigin distance using different algorithms (Supplementary Figure S2B) did not reveal large differences. The total number of peaks (origins) retrieved in each case is different: SICER and T-PICs returned the largest values. A pair-wise comparison

between the algorithms showed that MACS, BayesPeak and Homer rendered quite similar results as revealed by the percentage of coincidence (Supplementary Figure S2C). The summary of the total genomic regions covered by peaks (Supplementary Table S1) shows that SICER returned a high number of peaks and T-PIC of larger size, which cover a very large genomic percentage. This is unlikely to be the case. Measurement of SNS enrichment by PCR of various peaks is consistent with peaks of a smaller size, also in TEs.

These results led us to conclude that most peaks in Arabidopsis are relatively small, that is origins do not correspond with large initiation zones, which is consistent with the compact organization and small size of its genome. This together with the visual inspection of the original reads in the IGB viewer across all chromosomes, led us to conclude that MACS1.4 provided the most realistic identification of origins, in the case of Arabidopsis.

## References

1. Costas, C., de la Paz Sanchez, M., Stroud, H., Yu, Y., Oliveros, J.C., Feng, S., Benguria, A., Lopez-Vidriero, I., Zhang, X., Solano, R. *et al.* (2011) Genome-wide mapping of Arabidopsis thaliana origins of DNA replication and their associated epigenetic marks. *Nat Struc Mol Biol*, **18**, 395-400.
2. Rosenblatt, M. (1956) Remarks on Some Nonparametric Estimates of a Density Function. *Ann. Math. Stat.*, **27**, 832.
3. Parzen, E. (1962) On Estimation of a Probability Density Function and Mode. *Ann. Math. Stat.*, **33**, 1065.
4. Zhang, Y., Liu, T., Meyer, C.A., Eeckhoutte, J., Johnson, D.S., Bernstein, B.E., Nusbaum, C., Myers, R.M., Brown, M., Li, W. *et al.* (2008) Model-based analysis of ChIP-Seq (MACS). *Genome Biol*, **9**, R137.
5. Cairns, J., Spyrou, C., Stark, R., Smith, M.L., Lynch, A.G. and Tavare, S. (2011) BayesPeak--an R package for analysing ChIP-seq data. *Bioinformatics*, **27**, 713-714.
6. Heinz, S., Benner, C., Spann, N., Bertolino, E., Lin, Y.C., Laslo, P., Cheng, J.X., Murre, C., Singh, H. and Glass, C.K. (2010) Simple combinations of lineage-determining transcription factors prime cis-regulatory elements required for macrophage and B cell identities. *Mol Cell*, **38**, 576-589.
7. Zang, C., Schones, D.E., Zeng, C., Cui, K., Zhao, K. and Peng, W. (2009) A clustering approach for identification of enriched domains from histone modification ChIP-Seq data. *Bioinformatics*, **25**, 1952-1958.
8. Hower, V., Evans, S.N. and Pachter, L. (2011) Shape-based peak identification for ChIP-Seq. *BMC Bioinformatics*, **12**, 15.

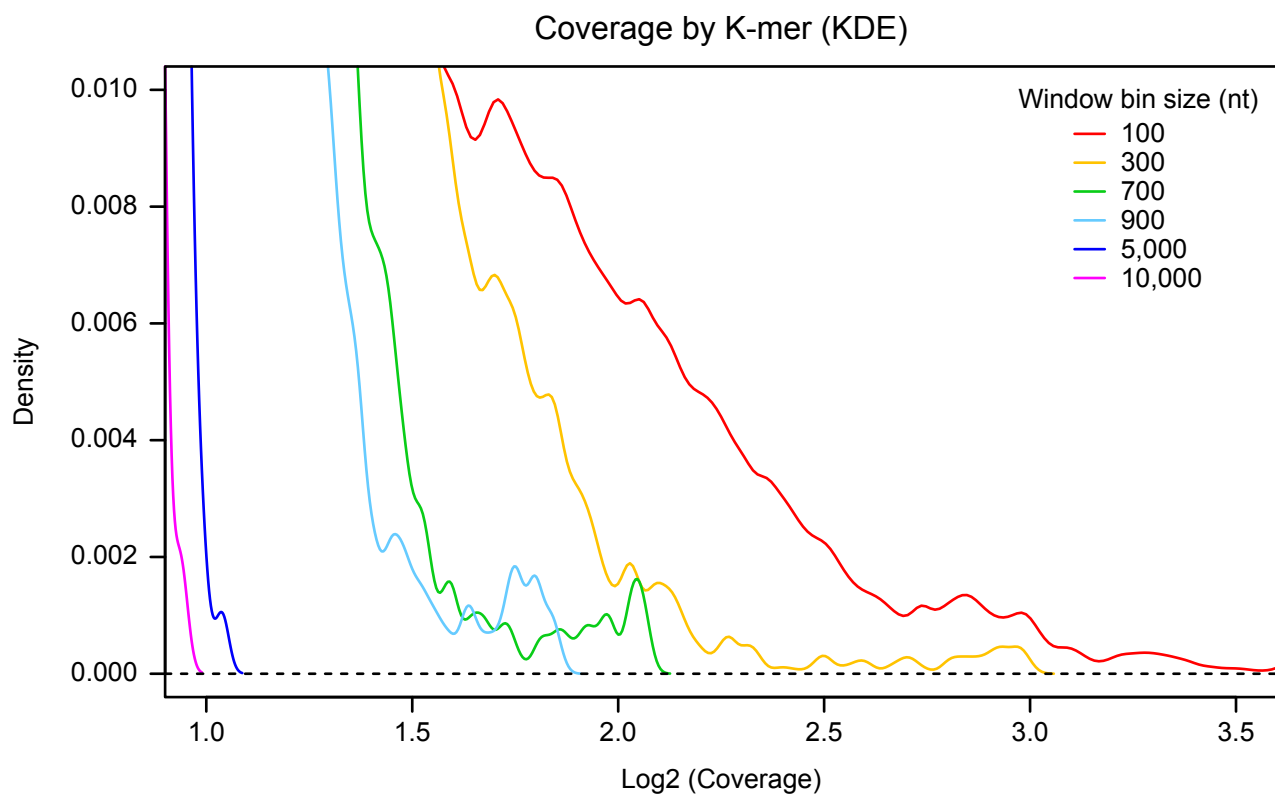

**Supplementary Figure S1. Distribution of the coverage using a kernel density estimator (KDE).**

**A**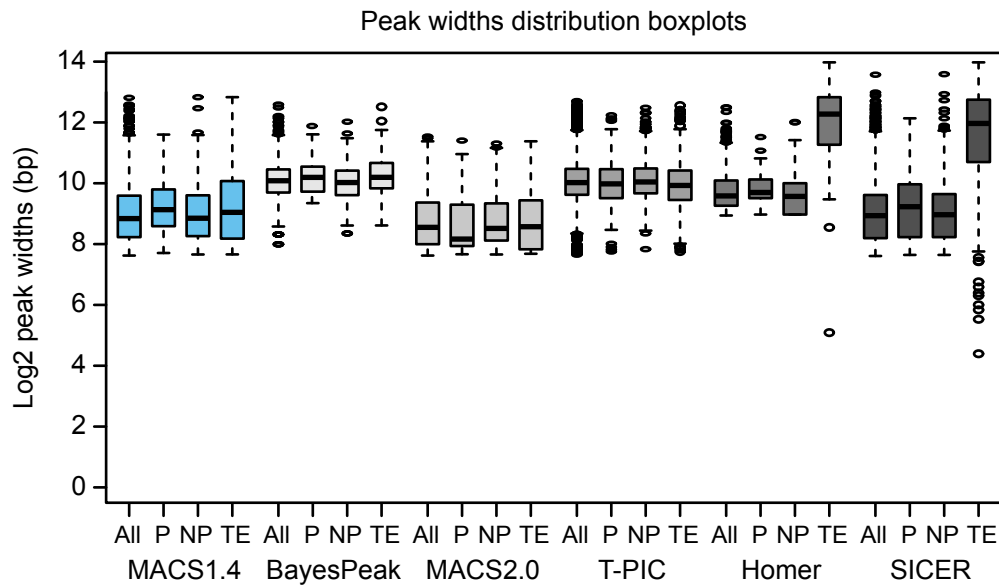**B**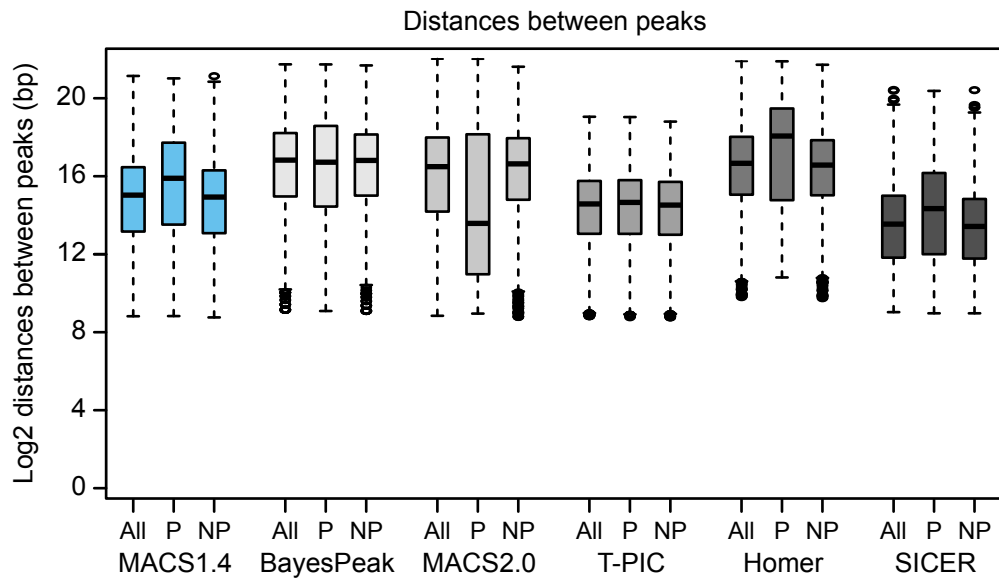**C**

|           | BayesPeak         | Homer              | MACS1.4             | MACS2.0             | SICER               | T-PIC               |
|-----------|-------------------|--------------------|---------------------|---------------------|---------------------|---------------------|
| BayesPeak | 1131<br>(100/100) | 653<br>(57.7/48.6) | 1036<br>(91.6/77.1) | 756<br>(66.8/56.2)  | 743<br>(65.7/8.8)   | 1040<br>(91.9/17.8) |
| Homer     |                   | 1344<br>(100/100)  | 1074<br>(79.9/33.2) | 839<br>(62.4/64.1)  | 643<br>(47.8/7.6)   | 1141<br>(84.9/19.5) |
| MACS1.4   |                   |                    | 3230<br>(100/100)   | 1182<br>(35.6/90.4) | 1107<br>(34.3/13.1) | 2467<br>(76.4/42.3) |
| MACS2.0   |                   |                    |                     | 1308<br>(100/100)   | 670<br>(51.2/7.9)   | 1245<br>(95.2/21.3) |
| SICER     |                   |                    |                     |                     | 8442<br>(100/100)   | 1309<br>(15.5/22.4) |
| T-PIC     |                   |                    |                     |                     |                     | 5836<br>(100/100)   |

### Supplementary Figure S2. Comparison of various peak-calling algorithms.

A. Distributions of peak width.

B. Distributions of interpeak distances.

C. Pair-wise comparison of peaks returned by all the algorithms used.

All = all the genome. P = pericentromeric regions. NP = non-pericentromeric regions.

TE = transposable elements

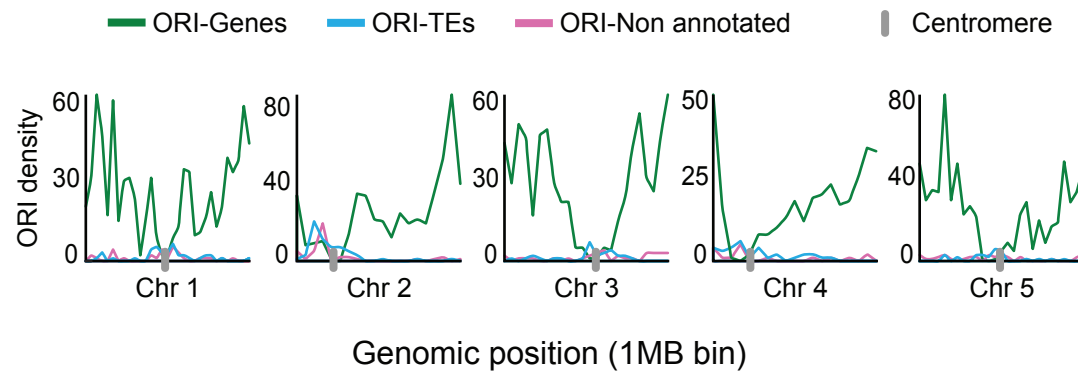

**Supplementary Figure S3. Distribution of ORIs across the five Arabidopsis chromosomes.** Number of ORIs (per 1 Mb bin) in genes (green), TEs (blue) and non-annotated regions (pink), as indicated, in each five Arabidopsis chromosomes. Grey bar depicts centromere localization.

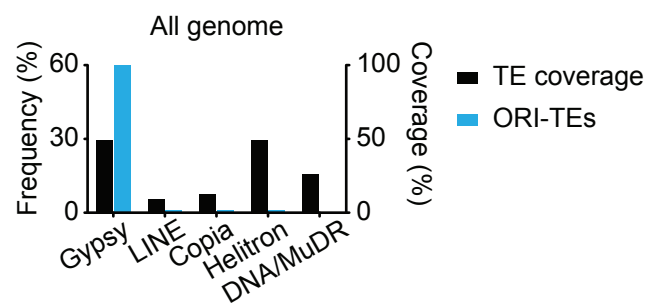

**Supplementary Figure S4.** Frequency distribution of ORI-TEs in TE families calculated using the multihit sequence reads (blue bars) with the corresponding TE coverage (black bars).

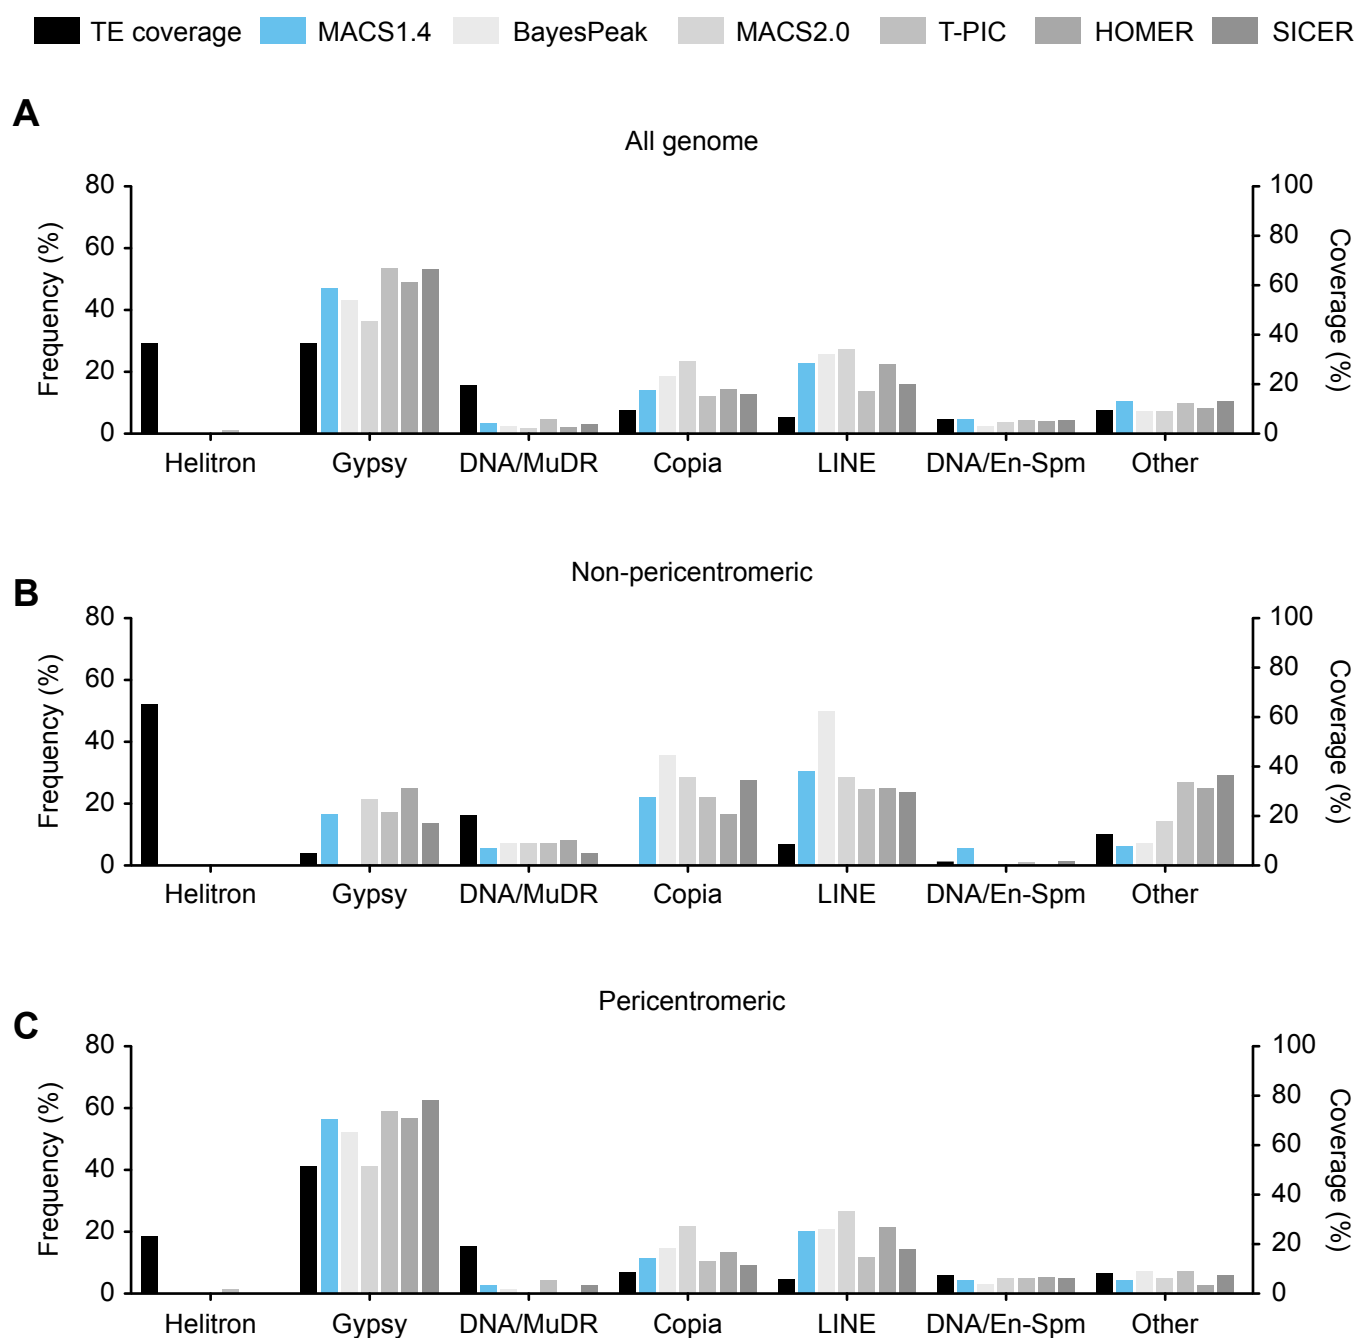

**Supplementary Figure S5. Frequency distribution of ORI-TEs (blue bars) in TE families** after using different peak-calling algorithms (grey bars) for all the Arabidopsis genome (A), non-pericentromeric regions (B) and pericentromeric regions (blue bars). The respective nucleotide coverage of each family is also shown (black bars).

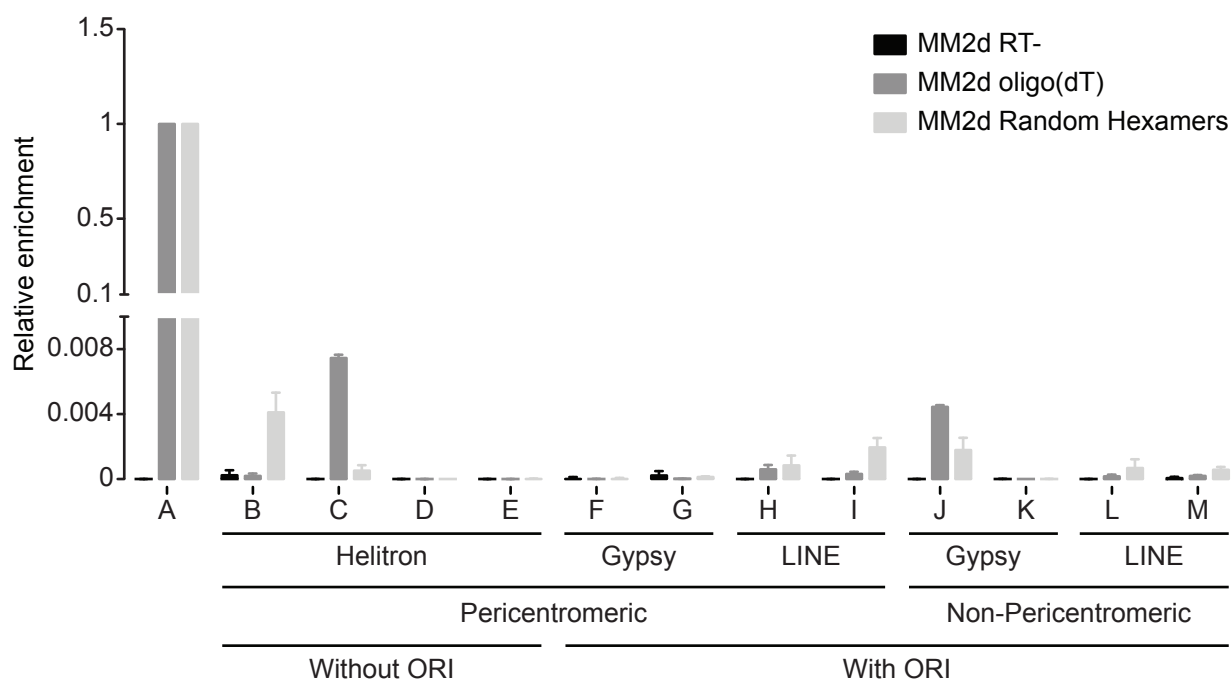

**Supplementary Figure S6. RNA levels in Arabidopsis MM2d cultured cells across TEs representative of various families and with or without ORIs.** Enrichment values were calculated as described in Methods and normalized against the housekeeping gene *GAPC-2* (*GLICERALDEHYDE-3-PHOSPHATE DEHYDROGENASE C-2*). Two biological replicates were evaluated. The mean values and standard deviation is plotted. The codes for the primer pairs used to identify each TE, according to the list in Supplementary Table 2, are: A, GAPDC2 At1g13440; B - AT2TE13970; C - AT2TE16335; D - AT4TE16735; E - AT4TE17050; F - AT4TE16725-2; G - AT4TE16725-3; H - AT2TE15565-2; I - AT2TE15565-3; J - AT1TE62820-3; K - AT1TE62820-5; L - AT4TE03295-3; M - AT4TE03295-4. RT- = Minus reverse transcriptase control.

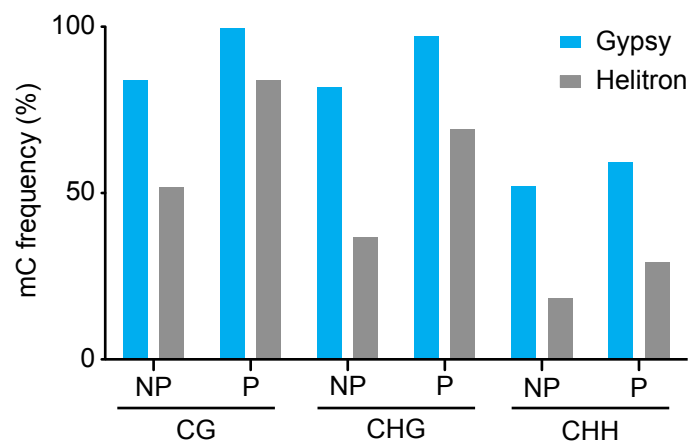

**Supplementary Figure S7. Fraction of cytosine methylation.** Fraction of methylated cytosines for Gypsy (blue) and Helitron (grey) elements, depending on the context (CG, CHG, CHH, where H=A, T or C) and region (P, pericentromeric; NP, non-pericentromeric).

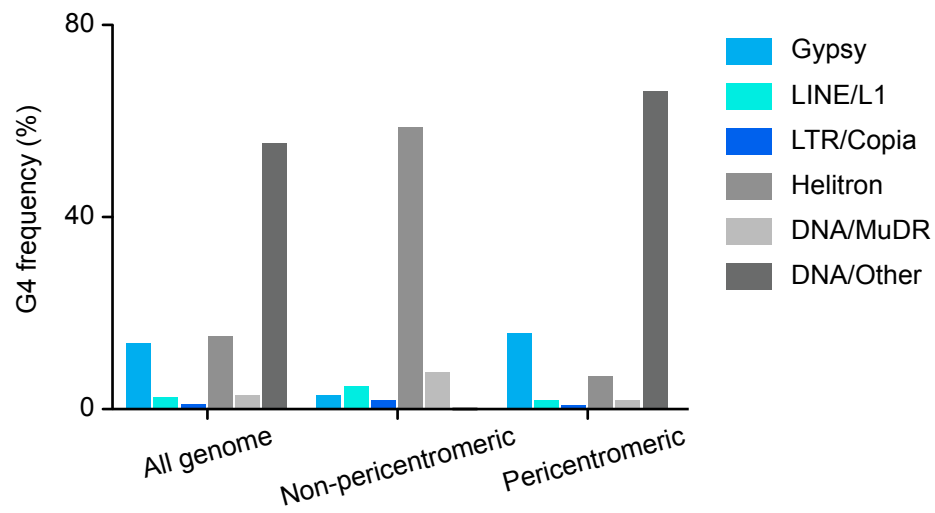

**Supplementary Figure S8. Colocalization of G4 quadruplexes and TEs.** Frequency of the predicted G quadruplexes (G4) in various TE families, as indicated, in whole genome, non-pericentromeric and pericentromeric regions.

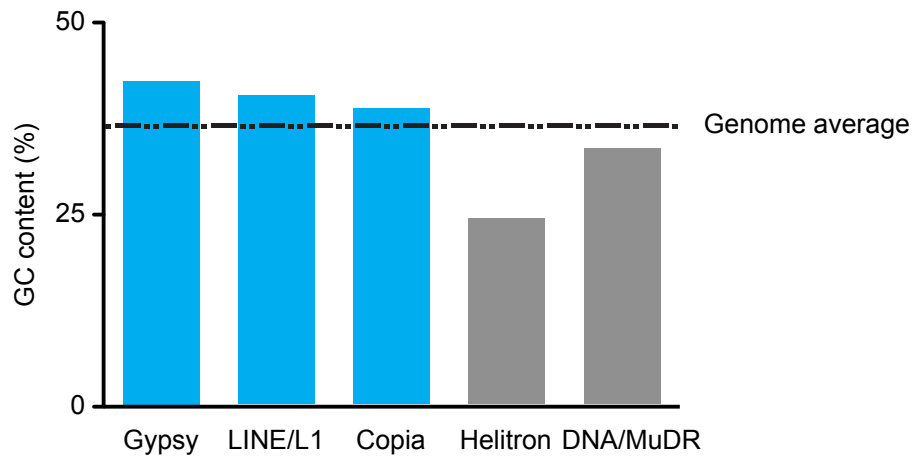

**Supplementary Figure S9. GC content in various Arabidopsis TE families.**

Note that retrotransposons (blue) tend to have a higher GC content compared to DNA transposons (grey).

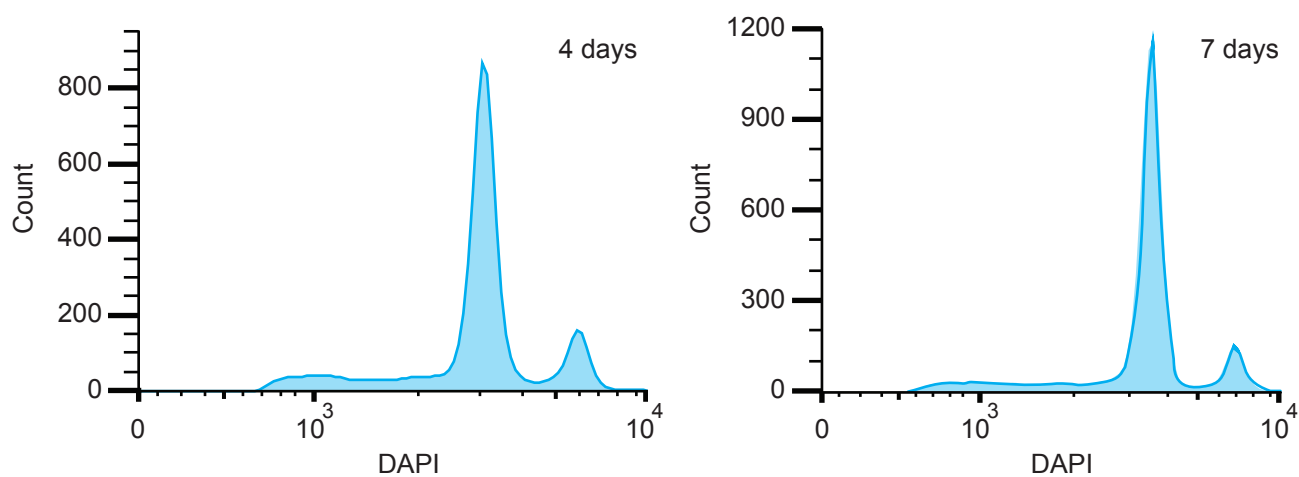

**Supplementary Figure S10. Flow cytometry profile of Arabidopsis MM2d cells used in this study.** The DNA content distribution of DAPI-stained nuclei of cultured Arabidopsis cells was estimated by flow cytometry at the indicated times after subculturing.

**Supplementary Table 1.** Number of peaks returned by the different peak calling algorithms in (A) all the genome and (B) transposable elements (TEs).

A

| Algorithm | Number of peaks | Mean peak length (nt) | Total size (nt) | % genome |
|-----------|-----------------|-----------------------|-----------------|----------|
| BayesPeak | 1,131           | 1,219                 | 1,378,286       | 1.16     |
| HOMER     | 1,344           | 950                   | 1,276,806       | 1.07     |
| MACS1.4   | 3,230           | 653                   | 2,110,158       | 1.77     |
| MACS2.0   | 1,308           | 537                   | 703,174         | 0.59     |
| SICER     | 8,442           | 670                   | 5,658,500       | 4.75     |
| T-PIC     | 5,836           | 1,232                 | 7,189,942       | 6.03     |

B

| Algorithm | Number of peaks | Mean peak length (nt) | Total size (nt) | % TEs |
|-----------|-----------------|-----------------------|-----------------|-------|
| BayesPeak | 81              | 1,426                 | 115,521         | 0.10  |
| HOMER     | 49              | 5,173                 | 253,494         | 0.21  |
| MACS1.4   | 161             | 912                   | 171,504         | 0.14  |
| MACS2.0   | 54              | 571                   | 30,883          | 0.03  |
| SICER     | 372             | 4,758                 | 1,769,840       | 1.49  |
| T-PIC     | 599             | 1,163                 | 696,548         | 0.58  |

**Supplementary Table S2.** List of primers used in this study indicating the procedures where they have been used: enrichment of nascent strands (SNS), RNA levels (RNA) and chromatin immunoprecipitation (ChIP).

| Primer name   | Sequence (5' -> 3')      | SNS | RNA | ChIP |
|---------------|--------------------------|-----|-----|------|
| AT1TE62820 1F | GTCGACAAGCCAAACTGGAT     | X   |     |      |
| AT1TE62820 1R | CCGATTTTCGGTTCTCCATA     |     |     |      |
| AT1TE62820 2F | TCCCGACAACAAAGTGAAGA     | X   |     |      |
| AT1TE62820 2R | CAAATAAACGGGAGGGTGTG     |     |     |      |
| AT1TE62820 3F | ACTGCGGAAAACGCTACTCA     | X   | X   | X    |
| AT1TE62820 3R | ACATCGACCGGGAACATAGC     |     |     |      |
| AT1TE62820 4F | TCCGAATTGGTTCTCTCCAG     | X   |     |      |
| AT1TE62820 4R | TGTCACCACTCGAGCTATGC     |     |     |      |
| AT1TE62820 5F | TTGCTTCGGAACTTTTCGCC     | X   | X   | X    |
| AT1TE62820 5R | ACCTCGTAGAGCGGGTGATA     |     |     |      |
| AT1TE62820 6F | TCTTCACCGACTACCGCATA     | X   |     |      |
| AT1TE62820 6R | CGATCGGAACGAAATCCTAA     |     |     |      |
| AT1G51350 1F  | AACACAATACCACAAACCAAAG   | X   |     |      |
| AT1G51350 1R  | AGTCAATGGAGTATAGATAGAG   |     |     |      |
| AT1G51350 2F  | TTCCAATCTAAGCCAAAACCTC   | X   |     |      |
| AT1G51350 2R  | ATCAGAATCGTCAGCATCAGC    |     |     |      |
| AT1G51350 3F  | GTATTATCGCTCATGCTTGTG    | X   |     |      |
| AT1G51350 3R  | TGACAACTAAGCAAAGACAAG    |     |     |      |
| AT1G51350 4F  | TCAATGGATCCAAATACTCGG    | X   |     |      |
| AT1G51350 4R  | TCAACAAGATTACGGAGGAGG    |     |     |      |
| AT1G51350 5F  | CTTTACTTGTGCCACTTTTAGA   | X   |     |      |
| AT1G51350 5R  | ATTTTAATTTTATGTTTTGCCACG |     |     |      |
| AT1G51350 6F  | GTGGGTTTGAATTTCTGGTAG    | X   |     |      |
| AT1G51350 6R  | TGTACCCAATAAAAAGGAAATG   |     |     |      |
| AT4TE16725 1F | TGAAAAGCACTACTGCGCTAA    | X   |     |      |
| AT4TE16725 1R | TCAACCGGACTGTTTGTTCA     |     |     |      |
| AT4TE16725 2F | CAGATCGGAAAAGGGAAGAG     | X   | X   | X    |
| AT4TE16725 2R | CCAAGGTAATTTCCCTCCTTC    |     |     |      |
| AT4TE16725 3F | CCCGGATTCCAGTTCACCTC     | X   | X   | X    |
| AT4TE16725 3R | TGGAGGCCATTAAACGTGGAC    |     |     |      |
| AT4TE16725 4F | CACCGCGTGAACGAGATAGT     | X   |     |      |
| AT4TE16725 4R | GCTACAGGACCATGTGAACCA    |     |     |      |
| AT4TE16725 5F | CAGTCAAAGGGGCAACCTAC     | X   |     |      |
| AT4TE16725 5R | AAGTGTGCCTTGACCTTTGG     |     |     |      |
| AT4TE16725 6F | CTACAATGCCCTGCTCATCA     | X   |     |      |
| AT4TE16725 6R | GCACCGGAGTCGTCAGTTAT     |     |     |      |
| AT2TE15565 1F | AAAGTGAAACCGGGTCAAAA     | X   |     |      |
| AT2TE15565 1R | TCACAAAAATACAAGTGGGTAAA  |     |     |      |
| AT2TE15565 2F | TCCTCACACGCTCCACATTA     | X   | X   | X    |
| AT2TE15565 2R | GAAACCTGAGGCTGAGGAGA     |     |     |      |
| AT2TE15565 3F | ACCCGGACTCCTCTTAGGAC     | X   | X   | X    |
| AT2TE15565 3R | AAGGCACAGTGGTGGTGAAT     |     |     |      |

|                  |                           |   |   |   |
|------------------|---------------------------|---|---|---|
| AT2TE15565 4F    | CTCGAACCAGTCATCTCATGG     |   |   |   |
| AT2TE15565 4R    | GTGGTGGCAGTGGTCAAGA       | X |   |   |
| AT4TE03295 1F    | TTGAAGAGTCCCCATTCCAC      |   |   |   |
| AT4TE03295 1R    | CGCGCCAATTTACTGGTATT      | X |   |   |
| AT4TE03295 2F    | TGAACTGGACCGGCTACTTT      |   |   |   |
| AT4TE03295 2R    | GGTCCCCGTTAGGAAACAAG      | X |   |   |
| AT4TE03295 3F    | GTAAACCACCTGCGACCATT      |   |   |   |
| AT4TE03295 3R    | TGAGCTGCGATACTGTCCAC      | X | X | X |
| AT4TE03295 4F    | AGTCTAGCACGAGAGTGGCT      |   |   |   |
| AT4TE03295 4R    | TTCTTTGTTCCAGGCAGCGT      | X | X | X |
| AT4TE03295 5F    | TTCTGCGGAGAGGAGGAGTC      |   |   |   |
| AT4TE03295 5R    | GGTATTGGGATCCAAGGGCT      | X |   |   |
| AT4TE03295 6F    | GTGGCTACATCCCTGACGAT      |   |   |   |
| AT4TE03295 6R    | ACGGTGGAAAACCTCCGGTAT     | X |   |   |
| AT2TE13970 F     | TTCGGCTTGATTTGAGCCAC      |   |   |   |
| AT2TE13970 R     | GTTAGCTGGTGGGAGGACAG      |   | X | X |
| AT2TE16335 F     | TGTGAAAGCCCATTACACTTTACT  |   |   |   |
| AT2TE16335 R     | ACGACGAATAAGGTTTGGGAGA    |   | X | X |
| AT4TE16735 F     | TCGTCAAATCTTTGGTGCTTGT    |   |   |   |
| AT4TE16735 R     | GCAATTAACGATCACCTAATCATGG |   | X | X |
| AT4TE17050 F     | ACACCAAATCTGCCACTCCA      |   |   |   |
| AT4TE17050 R     | TGTTTTTGGTGAATGATTGGATAGT |   | X | X |
| GAPC2 F          | TCCAACGCTAGTTGCACCAC      |   |   |   |
| GAPC2 R          | TGGACAGTGGTCATGAGTCC      |   | X |   |
| Neg AT2G28970 1F | AGAATGATTTGTTCTGGACGTG    |   |   |   |
| Neg AT2G28970 1R | GCCAGAAAAGAAGGCACAAG      | X |   |   |
| Neg AT2G28970 2F | CAAACCACCAATGGTTCACA      |   |   |   |
| Neg AT2G28970 2R | GGAGTTCCAGCCACAACAGT      | X |   |   |

**Supplementary Table S4.** ORI distribution in the indicated genomic locations. ORI location was determined using uniquely mapped reads.

| Feature       | MACS14 – All genome |        | Non-pericentromeric |        | Pericentromeric |        |
|---------------|---------------------|--------|---------------------|--------|-----------------|--------|
|               | No. ORIs            | % ORIs | No. ORIs            | % ORIs | No. ORIs        | % ORIs |
| Genes         | 2888                | 89.41  | 2724                | 94.98  | 164             | 45.3   |
| TEs           | 161                 | 4.98   | 39                  | 1.36   | 122             | 33.7   |
| Non-annotated | 154                 | 4.77   | 83                  | 2.89   | 71              | 19.61  |
| Overlapping   | 27                  | 0.84   | 22                  | 0.77   | 5               | 1.38   |
| Total         | 3230                | 100    | 2868                | 100    | 362             | 100    |

**Supplementary Table S5.** Distribution of ORIs resulting from multihit reads in the different genomic features.

| Feature       | MACS1.4 Multihit– All genome |        |
|---------------|------------------------------|--------|
|               | No. ORIs                     | % ORIs |
| Genes         | 77                           | 31.3   |
| TEs           | 118                          | 48.0   |
| Non-annotated | 47                           | 19.1   |
| Overlapping   | 4                            | 1.6    |
| Total         | 246                          | 100    |

**Supplementary Table S6.** Nucleotide coverage of TE families with respect to the total TE coverage and their contribution to ORI. Only ORIs overlapping with a unique TE family were included in this analysis.

| Family         | All genome |           | Non-pericentromeric |           | Pericentromeric |           |
|----------------|------------|-----------|---------------------|-----------|-----------------|-----------|
|                | % nt       | % ORI-TEs | % nt                | % ORI-TEs | % nt            | % ORI-TEs |
| RC/Helitron    | 29.42      | 0.00      | 52.31               | 0.00      | 18.80           | 0.00      |
| LTR/Gypsy      | 29.40      | 46.98     | 3.97                | 16.67     | 41.20           | 56.64     |
| DNA/MuDR       | 15.75      | 3.36      | 16.39               | 5.56      | 15.45           | 2.65      |
| LTR/Copia      | 7.67       | 14.09     | 8.91                | 22.22     | 7.10            | 11.50     |
| LINE/L1        | 5.38       | 22.82     | 6.83                | 30.56     | 4.71            | 20.35     |
| DNA/EN-SPM     | 4.63       | 4.70      | 1.30                | 5.56      | 6.18            | 4.42      |
| Other families | 7.74       | 10.62     | 10.30               | 6.19      | 6.56            | 4.42      |
