# Supplementary material for: Retrotransposons are specified as DNA replication origins in the gene-poor regions of Arabidopsis heterochromatin
Source: Oxford University Press journal article supplement (doi:10.1093/nar/gkx524), 2017-06-06
Supplement: gkx524_supp.zip [file gkx524_supp.zip › nar-00219-z-2017-File008.xlsx]

## Sheet: Total ORIs
Supplementary Table S3. List of DNA replication origins (ORIs) identified in Arabidopsis cultured cells.
CHR	START_INTERVAL	END_INTERVAL	MACS_NAME	10*log10(pvalue)
Chr1	48559	49054	MACS_peak_1	457.07
Chr1	73610	73857	MACS_peak_2	126.14
Chr1	117642	117932	MACS_peak_3	83.63
Chr1	158422	158660	MACS_peak_4	116.61
Chr1	206775	207178	MACS_peak_6	331.74
Chr1	311337	312593	MACS_peak_7_MACS_peak_8	1357.13
Chr1	337034	337407	MACS_peak_9	378.09
Chr1	341420	341670	MACS_peak_10	73.96
Chr1	353892	354183	MACS_peak_11	101.02
Chr1	362614	362858	MACS_peak_12	53.88
Chr1	567111	567406	MACS_peak_14	118.23
Chr1	618391	619236	MACS_peak_15	320.25
Chr1	702566	702870	MACS_peak_16	175.53
Chr1	761550	761925	MACS_peak_17	196.46
Chr1	787328	787576	MACS_peak_18	118.81
Chr1	790304	791000	MACS_peak_19_MACS_peak_20_MACS_peak_21	238.96
Chr1	814303	814611	MACS_peak_22	119.32
Chr1	883921	884725	MACS_peak_24	637.66
Chr1	931312	931514	MACS_peak_25	61.15
Chr1	1028689	1028896	MACS_peak_26	51.75
Chr1	1035435	1036265	MACS_peak_27	320.03
Chr1	1061414	1062010	MACS_peak_29_MACS_peak_30	66.5448
Chr1	1156185	1157014	MACS_peak_31_MACS_peak_32_MACS_peak_33	68.6369
Chr1	1166994	1167210	MACS_peak_34	68.05
Chr1	1191535	1191830	MACS_peak_35	76.42
Chr1	1214460	1214694	MACS_peak_36	64.93
Chr1	1292781	1293010	MACS_peak_37	63.5
Chr1	1342487	1342922	MACS_peak_39	82.11
Chr1	1392394	1393168	MACS_peak_40	1139.72
Chr1	1469758	1470022	MACS_peak_41	55.91
Chr1	1478193	1479033	MACS_peak_42	2471.84
Chr1	1484729	1485697	MACS_peak_43	291.57
Chr1	1486187	1486671	MACS_peak_44	127.03
Chr1	1510474	1510738	MACS_peak_45	54.09
Chr1	1547184	1547613	MACS_peak_46	101.59
Chr1	1602783	1603348	MACS_peak_47	160.45
Chr1	1630956	1631397	MACS_peak_48	116.2
Chr1	1635124	1635668	MACS_peak_49	198.65
Chr1	1645810	1646105	MACS_peak_50	127.81
Chr1	1646404	1646649	MACS_peak_51	66.71
Chr1	1666067	1666842	MACS_peak_52	169.84
Chr1	1667479	1668113	MACS_peak_53	421.31
Chr1	1671128	1671761	MACS_peak_54	849.56
Chr1	1682411	1682792	MACS_peak_55	62.78
Chr1	1702352	1702658	MACS_peak_56	80.68
Chr1	1767258	1767496	MACS_peak_57	54.6
Chr1	1769078	1769311	MACS_peak_58	57.61
Chr1	1803671	1803902	MACS_peak_59	54.97
Chr1	1818590	1818980	MACS_peak_60	231.72
Chr1	1820700	1821326	MACS_peak_61	152.13
Chr1	2012484	2013177	MACS_peak_62	189.49
Chr1	2024462	2024750	MACS_peak_63	71.86
Chr1	2025487	2025785	MACS_peak_64	104.71
Chr1	2034281	2034721	MACS_peak_65_MACS_peak_66	92.3543
Chr1	2034993	2035199	MACS_peak_67	54.22
Chr1	2044718	2047106	MACS_peak_68_MACS_peak_69_MACS_peak_70	452.933
Chr1	2067093	2068471	MACS_peak_72_MACS_peak_73_MACS_peak_74	124.54
Chr1	2071571	2072421	MACS_peak_75	197.07
Chr1	2090126	2091373	MACS_peak_76	502.04
Chr1	2095097	2095363	MACS_peak_77	62.39
Chr1	2105493	2105711	MACS_peak_78	53.35
Chr1	2108760	2109170	MACS_peak_79	86.21
Chr1	2125579	2125805	MACS_peak_80	53.7
Chr1	2138454	2139238	MACS_peak_81	152.34
Chr1	2151561	2152239	MACS_peak_82	484.05
Chr1	2155318	2155572	MACS_peak_83	82.85
Chr1	2160193	2160537	MACS_peak_84	96.52
Chr1	2174238	2174521	MACS_peak_85	67.52
Chr1	2187913	2188376	MACS_peak_86	120.54
Chr1	2193277	2193479	MACS_peak_87	62.82
Chr1	2194696	2195864	MACS_peak_88	365.92
Chr1	2209481	2210759	MACS_peak_89_MACS_peak_90	97.7963
Chr1	2211725	2212225	MACS_peak_91	84.23
Chr1	2222251	2222865	MACS_peak_92_MACS_peak_93	68.5305
Chr1	2223901	2225148	MACS_peak_94_MACS_peak_95	180.592
Chr1	2226061	2227413	MACS_peak_96_MACS_peak_97	159.757
Chr1	2227746	2228727	MACS_peak_98_MACS_peak_99	92.7698
Chr1	2247764	2249796	MACS_peak_100_MACS_peak_101	729.827
Chr1	2260610	2261296	MACS_peak_102	278.98
Chr1	2281231	2281496	MACS_peak_103	58
Chr1	2349228	2350434	MACS_peak_105	1818.26
Chr1	2350711	2351079	MACS_peak_106	145.9
Chr1	2371070	2371522	MACS_peak_107_MACS_peak_108	109.891
Chr1	2395255	2396485	MACS_peak_109_MACS_peak_110	355.242
Chr1	2396776	2397133	MACS_peak_111	67.07
Chr1	2398081	2398561	MACS_peak_112	112.15
Chr1	2427419	2428752	MACS_peak_114	244.87
Chr1	2486427	2486642	MACS_peak_115	50.4
Chr1	2500355	2500669	MACS_peak_116	54.93
Chr1	2538414	2538615	MACS_peak_117	61.07
Chr1	2588980	2590366	MACS_peak_118	183.66
Chr1	2608315	2609242	MACS_peak_119	1239.83
Chr1	2620713	2621146	MACS_peak_120	118.72
Chr1	2691479	2691783	MACS_peak_121	95.4
Chr1	2721611	2721937	MACS_peak_122	88.12
Chr1	2752428	2752875	MACS_peak_123	108.16
Chr1	2757290	2757506	MACS_peak_124	62.27
Chr1	2771050	2771259	MACS_peak_125	54.06
Chr1	2771679	2771905	MACS_peak_126	54.85
Chr1	2773962	2774344	MACS_peak_127	121.57
Chr1	2824537	2824939	MACS_peak_128	240.87
Chr1	2885268	2885563	MACS_peak_129	139.83
Chr1	2888969	2889381	MACS_peak_130	56.4
Chr1	2891043	2891269	MACS_peak_131	50.93
Chr1	2922322	2922548	MACS_peak_132	53
Chr1	2927788	2928716	MACS_peak_133_MACS_peak_134	114.386
Chr1	2941362	2942472	MACS_peak_135_MACS_peak_136	710.978
Chr1	2966807	2967543	MACS_peak_137	214.81
Chr1	2971768	2972055	MACS_peak_138	64.82
Chr1	2994354	2994970	MACS_peak_139	860.63
Chr1	3012027	3012354	MACS_peak_140	103.54
Chr1	3069866	3070121	MACS_peak_141	64.67
Chr1	3071472	3071824	MACS_peak_142	73.74
Chr1	3109582	3109800	MACS_peak_143	55.67
Chr1	3135752	3135980	MACS_peak_145	53.13
Chr1	3137322	3137543	MACS_peak_146	68.43
Chr1	3143312	3144133	MACS_peak_148_MACS_peak_149	73.5499
Chr1	3154600	3155078	MACS_peak_150	161.69
Chr1	3157407	3158373	MACS_peak_151_MACS_peak_152	192.277
Chr1	3224218	3224770	MACS_peak_155	124.76
Chr1	3252387	3253243	MACS_peak_156_MACS_peak_157	72.2202
Chr1	3270127	3270557	MACS_peak_158	80.51
Chr1	3332418	3333295	MACS_peak_159_MACS_peak_160	90.8546
Chr1	3334826	3335979	MACS_peak_161_MACS_peak_162_MACS_peak_163	77.3222
Chr1	3339382	3339649	MACS_peak_164	55.36
Chr1	3354368	3354573	MACS_peak_165	54.14
Chr1	3363794	3364102	MACS_peak_166	50.06
Chr1	3370503	3370944	MACS_peak_167	87.27
Chr1	3389266	3390051	MACS_peak_168	292.09
Chr1	3390557	3390893	MACS_peak_169	81.19
Chr1	3391751	3392432	MACS_peak_170_MACS_peak_171	58.9396
Chr1	3394241	3394643	MACS_peak_172	74.49
Chr1	3439842	3440272	MACS_peak_173	117.7
Chr1	3484359	3485920	MACS_peak_174_MACS_peak_175_MACS_peak_176	852.641
Chr1	3486234	3486657	MACS_peak_177	124.27
Chr1	3492336	3493639	MACS_peak_178	951.08
Chr1	3607817	3608123	MACS_peak_179	162.42
Chr1	3612781	3613156	MACS_peak_180	58.4
Chr1	3664267	3664771	MACS_peak_181	89.77
Chr1	3719258	3719598	MACS_peak_182	83.13
Chr1	3756497	3756786	MACS_peak_183	61.73
Chr1	3760634	3761082	MACS_peak_184_MACS_peak_185	63.2096
Chr1	3798741	3798982	MACS_peak_186	56.43
Chr1	3800974	3801200	MACS_peak_187	82.61
Chr1	3822409	3823439	MACS_peak_188	711.62
Chr1	3837143	3837639	MACS_peak_189	107.33
Chr1	3846668	3846919	MACS_peak_190	58.16
Chr1	3847254	3847561	MACS_peak_191	99.31
Chr1	3878893	3879310	MACS_peak_192	93.98
Chr1	3889061	3890326	MACS_peak_193_MACS_peak_194	330.798
Chr1	3903287	3903583	MACS_peak_195	110.38
Chr1	3914008	3914461	MACS_peak_196	114.13
Chr1	3914904	3915239	MACS_peak_197	72.55
Chr1	3965574	3965880	MACS_peak_198	88.44
Chr1	3966500	3966891	MACS_peak_199	125.91
Chr1	4062987	4063222	MACS_peak_200	56.12
Chr1	4076340	4076833	MACS_peak_201_MACS_peak_202	55.094
Chr1	4137631	4138120	MACS_peak_203	155.05
Chr1	4172039	4172518	MACS_peak_204	104.99
Chr1	4187501	4188044	MACS_peak_205	654.21
Chr1	4195340	4196132	MACS_peak_206_MACS_peak_207	196.999
Chr1	4327127	4327378	MACS_peak_209	65.13
Chr1	4416746	4416957	MACS_peak_210	69.48
Chr1	4442423	4442724	MACS_peak_213	106.85
Chr1	4529010	4529647	MACS_peak_215	122.62
Chr1	4577237	4578032	MACS_peak_216_MACS_peak_217	481.043
Chr1	4753538	4754009	MACS_peak_218	199.7
Chr1	4754361	4755139	MACS_peak_219	303.14
Chr1	4934955	4935712	MACS_peak_220	533.58
Chr1	4952420	4952729	MACS_peak_221	131.8
Chr1	4958755	4959592	MACS_peak_222	696.31
Chr1	5076796	5077293	MACS_peak_223	69.32
Chr1	5081607	5081989	MACS_peak_224	87.93
Chr1	5104100	5104750	MACS_peak_225	256.05
Chr1	5107436	5108642	MACS_peak_226_MACS_peak_227	169.337
Chr1	5137168	5137711	MACS_peak_228	122.46
Chr1	5138540	5139645	MACS_peak_229_MACS_peak_230	108.716
Chr1	5139914	5140875	MACS_peak_231	274.72
Chr1	5149429	5151005	MACS_peak_232	138.73
Chr1	5164431	5165163	MACS_peak_233	126.74
Chr1	5168515	5169895	MACS_peak_234	268.55
Chr1	5180197	5181308	MACS_peak_235	106.89
Chr1	5204358	5207102	MACS_peak_236_MACS_peak_237	523.604
Chr1	5207569	5209923	MACS_peak_238	626.73
Chr1	5211659	5212312	MACS_peak_239	136.01
Chr1	5220602	5220918	MACS_peak_240	54.92
Chr1	5224456	5224675	MACS_peak_241	52.82
Chr1	5227165	5228123	MACS_peak_242	203.3
Chr1	5230227	5231074	MACS_peak_243	258.43
Chr1	5231539	5233112	MACS_peak_244_MACS_peak_245	110.522
Chr1	5233694	5235017	MACS_peak_246	290.28
Chr1	5235803	5236658	MACS_peak_247	482.18
Chr1	5240621	5243379	MACS_peak_248_MACS_peak_249_MACS_peak_250	193.998
Chr1	5248852	5249564	MACS_peak_251	57.78
Chr1	5251780	5252790	MACS_peak_252	100.63
Chr1	5253777	5254851	MACS_peak_253	102.21
Chr1	5257301	5258810	MACS_peak_254	138.85
Chr1	5265844	5268618	MACS_peak_255_MACS_peak_256	176.851
Chr1	5271610	5277276	MACS_peak_257_MACS_peak_258	1153.25
Chr1	5278357	5279137	MACS_peak_259	137.14
Chr1	5283956	5284485	MACS_peak_260	50.44
Chr1	5294657	5295676	MACS_peak_261_MACS_peak_262	71.0319
Chr1	5296346	5296895	MACS_peak_263	85.22
Chr1	5304929	5305834	MACS_peak_264	118.17
Chr1	5306417	5309674	MACS_peak_265	1274.03
Chr1	5310569	5311119	MACS_peak_266	58.72
Chr1	5321510	5322894	MACS_peak_267	73.38
Chr1	5328991	5330836	MACS_peak_268	53.95
Chr1	5339953	5341875	MACS_peak_269	435.64
Chr1	5344580	5345168	MACS_peak_270	69.24
Chr1	5345550	5346111	MACS_peak_271	73.01
Chr1	5363780	5364740	MACS_peak_272	144.74
Chr1	5366094	5366394	MACS_peak_273	52.74
Chr1	5374870	5375359	MACS_peak_274	116.08
Chr1	5383943	5384247	MACS_peak_275	261.56
Chr1	5390082	5391214	MACS_peak_276	200.58
Chr1	5398764	5399401	MACS_peak_277	53.07
Chr1	5400579	5401931	MACS_peak_278	126.26
Chr1	5404311	5405391	MACS_peak_279	106.28
Chr1	5405910	5406604	MACS_peak_280	77.13
Chr1	5409409	5410051	MACS_peak_281	95.15
Chr1	5444532	5445335	MACS_peak_282	247.71
Chr1	5446275	5447465	MACS_peak_283_MACS_peak_284	331.226
Chr1	5448423	5449058	MACS_peak_285_MACS_peak_286	127.488
Chr1	5449331	5450312	MACS_peak_287_MACS_peak_288	147.342
Chr1	5520347	5520645	MACS_peak_289	75.5
Chr1	5524581	5524826	MACS_peak_290	106.77
Chr1	5530898	5531159	MACS_peak_291	87.82
Chr1	5537873	5538133	MACS_peak_292	100.55
Chr1	5839367	5839645	MACS_peak_294	93.68
Chr1	5975416	5975704	MACS_peak_295	93.05
Chr1	5980419	5981025	MACS_peak_296	342.23
Chr1	6239248	6239625	MACS_peak_297	129.86
Chr1	6577151	6577477	MACS_peak_298	112.35
Chr1	6688892	6689873	MACS_peak_299_MACS_peak_300	137.008
Chr1	6774714	6774919	MACS_peak_301	65.98
Chr1	6889494	6889894	MACS_peak_303	51.33
Chr1	6890251	6890699	MACS_peak_304	71.97
Chr1	6891973	6892458	MACS_peak_305	55.46
Chr1	6895776	6896114	MACS_peak_306	76.26
Chr1	6917076	6917405	MACS_peak_307	83.45
Chr1	6938153	6938639	MACS_peak_308	88.43
Chr1	6945794	6946625	MACS_peak_309	297.98
Chr1	6958188	6958764	MACS_peak_310	88.63
Chr1	6971454	6972564	MACS_peak_311	96.05
Chr1	6978024	6978582	MACS_peak_312	78.3
Chr1	7008036	7008283	MACS_peak_315	71.55
Chr1	7008609	7009355	MACS_peak_316_MACS_peak_317	61.0433
Chr1	7039074	7040081	MACS_peak_318	137.92
Chr1	7042707	7044365	MACS_peak_319_MACS_peak_320	143.968
Chr1	7047105	7047510	MACS_peak_321	61.66
Chr1	7053038	7053716	MACS_peak_322	214.51
Chr1	7061541	7061876	MACS_peak_323	69.18
Chr1	7083573	7083930	MACS_peak_324	68.56
Chr1	7095828	7097262	MACS_peak_325	3052.62
Chr1	7097554	7097840	MACS_peak_326	72.88
Chr1	7098466	7099484	MACS_peak_327_MACS_peak_328	158.411
Chr1	7144091	7145229	MACS_peak_329_MACS_peak_330	506.75
Chr1	7145980	7146187	MACS_peak_331	59.5
Chr1	7148670	7148993	MACS_peak_332	180.08
Chr1	7176340	7176567	MACS_peak_334	108.06
Chr1	7226538	7227477	MACS_peak_335_MACS_peak_336	223.558
Chr1	7273296	7273504	MACS_peak_337	53.61
Chr1	7440490	7440879	MACS_peak_338	162.96
Chr1	7549707	7549960	MACS_peak_339	84.7
Chr1	7579112	7579405	MACS_peak_340	53.85
Chr1	7591265	7591472	MACS_peak_341	67.39
Chr1	7595072	7595635	MACS_peak_342	251.87
Chr1	7611008	7611741	MACS_peak_343	746.31
Chr1	7612890	7614399	MACS_peak_344_MACS_peak_345	317.661
Chr1	7624372	7624654	MACS_peak_346	123.72
Chr1	7641592	7641941	MACS_peak_347	174.27
Chr1	7846730	7847679	MACS_peak_348	610.98
Chr1	7865086	7865357	MACS_peak_349	84.26
Chr1	7883380	7883591	MACS_peak_350	70.11
Chr1	8021272	8021966	MACS_peak_352_MACS_peak_353	74.9758
Chr1	8032260	8032596	MACS_peak_354	71.86
Chr1	8047838	8048240	MACS_peak_355	88.61
Chr1	8119977	8120592	MACS_peak_356	521.61
Chr1	8135588	8135812	MACS_peak_357	50.85
Chr1	8212726	8213022	MACS_peak_358	308.49
Chr1	8240087	8240461	MACS_peak_359	128.57
Chr1	8309625	8310655	MACS_peak_360	199.77
Chr1	8313966	8314752	MACS_peak_361	95.57
Chr1	8349242	8349791	MACS_peak_362	118.75
Chr1	8398837	8399679	MACS_peak_363	74.78
Chr1	8402154	8404247	MACS_peak_364	261.7
Chr1	8405155	8406703	MACS_peak_365	130.72
Chr1	8407904	8408648	MACS_peak_366	110.02
Chr1	8427256	8429301	MACS_peak_367	102.4
Chr1	8523120	8523560	MACS_peak_369	81
Chr1	8531915	8532369	MACS_peak_370	50.05
Chr1	8536212	8536832	MACS_peak_371	100.66
Chr1	8562925	8563212	MACS_peak_372	50.01
Chr1	8613592	8614230	MACS_peak_373	160.35
Chr1	8616064	8616321	MACS_peak_374	109.86
Chr1	8634034	8634656	MACS_peak_375	204.33
Chr1	8664648	8664935	MACS_peak_376	68.36
Chr1	8687972	8688342	MACS_peak_377	65.71
Chr1	8693575	8694315	MACS_peak_378	270.62
Chr1	8703551	8703912	MACS_peak_379	87.51
Chr1	8704450	8705204	MACS_peak_380	233.6
Chr1	8722386	8722682	MACS_peak_381	73.08
Chr1	8906733	8907152	MACS_peak_382	196.21
Chr1	9025985	9026815	MACS_peak_383	65.73
Chr1	9031004	9031309	MACS_peak_384	64.4
Chr1	9042008	9042893	MACS_peak_385_MACS_peak_386	65.3982
Chr1	9071158	9071777	MACS_peak_387	65.52
Chr1	9119002	9119314	MACS_peak_388	51.51
Chr1	9138927	9139603	MACS_peak_389	83.81
Chr1	9246325	9247180	MACS_peak_390	972.32
Chr1	9393696	9394157	MACS_peak_391	158.09
Chr1	9421902	9422111	MACS_peak_392	70.52
Chr1	9434680	9434960	MACS_peak_393	51.65
Chr1	9450250	9450559	MACS_peak_394	58.11
Chr1	9536138	9536463	MACS_peak_396	52.86
Chr1	9591971	9592753	MACS_peak_398_MACS_peak_399	66.9102
Chr1	9605785	9606042	MACS_peak_400	85.25
Chr1	9615665	9615889	MACS_peak_401	57.2
Chr1	9640888	9641643	MACS_peak_402	314.74
Chr1	9662582	9663104	MACS_peak_403	238.87
Chr1	9731603	9732234	MACS_peak_405	116.67
Chr1	9778976	9779255	MACS_peak_406	93.32
Chr1	9876539	9877280	MACS_peak_407	273.78
Chr1	9886678	9887169	MACS_peak_408	654.74
Chr1	9966998	9967948	MACS_peak_409_MACS_peak_410	184.052
Chr1	10023903	10024177	MACS_peak_411	256.47
Chr1	10903455	10904044	MACS_peak_412	373.47
Chr1	11588071	11588314	MACS_peak_414	64.91
Chr1	11651351	11652197	MACS_peak_415	163.92
Chr1	11652576	11653083	MACS_peak_416	174.54
Chr1	11673476	11673763	MACS_peak_417	57.86
Chr1	11784055	11784431	MACS_peak_419	54.97
Chr1	11795907	11796476	MACS_peak_420	106.16
Chr1	11799033	11800888	MACS_peak_421_MACS_peak_422	665.811
Chr1	11811392	11811952	MACS_peak_423	87.72
Chr1	11821102	11821456	MACS_peak_424	72.71
Chr1	11845328	11846120	MACS_peak_425	183.64
Chr1	11925428	11925833	MACS_peak_426	53.15
Chr1	11943085	11943698	MACS_peak_427	106.81
Chr1	11967359	11967666	MACS_peak_428	80.43
Chr1	11969135	11969755	MACS_peak_429	79.4
Chr1	12024465	12025105	MACS_peak_430	164.4
Chr1	12066492	12066816	MACS_peak_431	53.43
Chr1	12092614	12094262	MACS_peak_432_MACS_peak_433	432.58
Chr1	12099834	12101234	MACS_peak_434	65.24
Chr1	12109029	12109434	MACS_peak_435	60.9
Chr1	12121949	12123335	MACS_peak_436_MACS_peak_437	92.9887
Chr1	12128051	12129386	MACS_peak_438_MACS_peak_439	74.5109
Chr1	12148742	12149289	MACS_peak_440	63.49
Chr1	12177720	12178677	MACS_peak_441	81.09
Chr1	12181449	12182096	MACS_peak_442	60.8
Chr1	12191388	12192153	MACS_peak_443	75.19
Chr1	12201933	12203274	MACS_peak_444	155.81
Chr1	12203895	12204537	MACS_peak_445	102.55
Chr1	12207106	12208550	MACS_peak_446	118.1
Chr1	12237884	12238507	MACS_peak_447	134.84
Chr1	12242460	12244130	MACS_peak_448	173.64
Chr1	12244779	12245428	MACS_peak_449	78.74
Chr1	12293934	12295046	MACS_peak_451	72.62
Chr1	12353139	12353421	MACS_peak_452	57.28
Chr1	12353857	12354287	MACS_peak_453	62.08
Chr1	12376727	12377122	MACS_peak_454	130.24
Chr1	12452161	12454541	MACS_peak_455_MACS_peak_456_MACS_peak_457_MACS_peak_458	175.266
Chr1	12462429	12462751	MACS_peak_459	334.46
Chr1	12503468	12503961	MACS_peak_460	101.67
Chr1	12545285	12546028	MACS_peak_461	92.65
Chr1	12551229	12552440	MACS_peak_462	195.42
Chr1	12650494	12651187	MACS_peak_463	1010.1
Chr1	12663130	12663458	MACS_peak_464	54.55
Chr1	12840451	12841122	MACS_peak_465_MACS_peak_466	71.7792
Chr1	12852103	12853006	MACS_peak_467	55.61
Chr1	12860168	12860552	MACS_peak_468	80.96
Chr1	12860826	12861309	MACS_peak_469	55.45
Chr1	12905442	12906037	MACS_peak_470_MACS_peak_471	96.5057
Chr1	12917153	12917630	MACS_peak_472	93.05
Chr1	13040233	13040511	MACS_peak_473	165.72
Chr1	13116199	13117100	MACS_peak_474_MACS_peak_475	87.1776
Chr1	13208662	13209071	MACS_peak_476	98.67
Chr1	13228907	13229604	MACS_peak_477	437.16
Chr1	13254807	13255276	MACS_peak_478	76.97
Chr1	13339115	13339632	MACS_peak_479	102.32
Chr1	13454322	13455489	MACS_peak_481	1436.58
Chr1	13493955	13494276	MACS_peak_482	53.05
Chr1	13698324	13698687	MACS_peak_483	75.41
Chr1	13777583	13777947	MACS_peak_484	58.84
Chr1	13778722	13779693	MACS_peak_485	99.45
Chr1	13911159	13911652	MACS_peak_486	53.46
Chr1	13944863	13945075	MACS_peak_487	52.21
Chr1	13948438	13951246	MACS_peak_488_MACS_peak_489	1498.12
Chr1	14028647	14029230	MACS_peak_490	68.89
Chr1	14143745	14143984	MACS_peak_491	52.49
Chr1	14158511	14161616	MACS_peak_492_MACS_peak_493	1259.09
Chr1	14165269	14165482	MACS_peak_494	69.67
Chr1	14229939	14230345	MACS_peak_496_MACS_peak_497	60.1041
Chr1	14251781	14252533	MACS_peak_498_MACS_peak_499	67.208
Chr1	14285427	14285824	MACS_peak_500	156.66
Chr1	14541031	14541707	MACS_peak_501	57.6
Chr1	14601236	14601721	MACS_peak_502_MACS_peak_503	81.3833
Chr1	15415064	15415730	MACS_peak_504	57.97
Chr1	15434344	15434697	MACS_peak_505	418.35
Chr1	15579953	15580304	MACS_peak_506	55.41
Chr1	15599157	15599740	MACS_peak_507	256.27
Chr1	15964162	15964370	MACS_peak_509	81.02
Chr1	15977079	15978336	MACS_peak_510	97.98
Chr1	16193499	16193722	MACS_peak_511	56.34
Chr1	16267461	16268347	MACS_peak_512_MACS_peak_513	115.833
Chr1	16310276	16311006	MACS_peak_514_MACS_peak_515	71.1236
Chr1	16315957	16316426	MACS_peak_516	66.33
Chr1	16320538	16321000	MACS_peak_517	66.18
Chr1	16432648	16433001	MACS_peak_519	119.31
Chr1	16478627	16479480	MACS_peak_520	530.74
Chr1	16508805	16509694	MACS_peak_521	133
Chr1	16522231	16522521	MACS_peak_523	51.82
Chr1	16578979	16579454	MACS_peak_526	125.97
Chr1	16588147	16588500	MACS_peak_527	75.98
Chr1	16644128	16644591	MACS_peak_529_MACS_peak_530	53.7605
Chr1	16729082	16730139	MACS_peak_533_MACS_peak_534	261.433
Chr1	16730742	16731006	MACS_peak_535	63.41
Chr1	16745320	16745796	MACS_peak_536	84.76
Chr1	16786386	16786946	MACS_peak_537	55.38
Chr1	16821561	16821776	MACS_peak_538	69.96
Chr1	16853452	16856256	MACS_peak_539	67.79
Chr1	17090209	17090425	MACS_peak_541	52.16
Chr1	17179207	17179609	MACS_peak_542	148.07
Chr1	17251758	17252040	MACS_peak_543	68.83
Chr1	17310875	17311378	MACS_peak_544	130.63
Chr1	17342053	17343394	MACS_peak_545	624.59
Chr1	17473966	17474209	MACS_peak_546	67.25
Chr1	17529191	17531700	MACS_peak_547	565.57
Chr1	17533185	17535624	MACS_peak_548_MACS_peak_549	522.413
Chr1	17536089	17536448	MACS_peak_550	67.29
Chr1	17779362	17779641	MACS_peak_551	130.66
Chr1	17829975	17830306	MACS_peak_552	66.37
Chr1	17871577	17872028	MACS_peak_553	438.76
Chr1	17875349	17877249	MACS_peak_554_MACS_peak_555	409.595
Chr1	17891290	17891557	MACS_peak_556	51.65
Chr1	17959501	17960799	MACS_peak_557_MACS_peak_558_MACS_peak_559	95.7177
Chr1	17975158	17976291	MACS_peak_560	864.93
Chr1	17994917	17995210	MACS_peak_561	59
Chr1	18038172	18039250	MACS_peak_562	489.5
Chr1	18116974	18117599	MACS_peak_563	150.2
Chr1	18121398	18121754	MACS_peak_564	92.91
Chr1	18123546	18124015	MACS_peak_565	104.99
Chr1	18150626	18150960	MACS_peak_566	80.93
Chr1	18159817	18160147	MACS_peak_567_MACS_peak_568	72.9038
Chr1	18252199	18252997	MACS_peak_572	1061.85
Chr1	18332707	18332946	MACS_peak_573	60.18
Chr1	18351614	18352045	MACS_peak_574	106.22
Chr1	18376088	18376342	MACS_peak_576	91.34
Chr1	18377597	18379771	MACS_peak_577_MACS_peak_578_MACS_peak_579	584.499
Chr1	18429137	18430042	MACS_peak_580	1010.76
Chr1	18470468	18471520	MACS_peak_581_MACS_peak_582	177.181
Chr1	18542188	18543725	MACS_peak_583	2408.37
Chr1	18567554	18567858	MACS_peak_584	100.8
Chr1	18615581	18616884	MACS_peak_585_MACS_peak_586_MACS_peak_587	202.735
Chr1	18639187	18639453	MACS_peak_588	67.75
Chr1	18662158	18662616	MACS_peak_589	82
Chr1	18678476	18679584	MACS_peak_590_MACS_peak_591	61.2554
Chr1	18703025	18704113	MACS_peak_592_MACS_peak_593	112.671
Chr1	18720583	18721368	MACS_peak_594_MACS_peak_595	106.087
Chr1	18725400	18725794	MACS_peak_597	153.3
Chr1	18726296	18726796	MACS_peak_598	141.41
Chr1	18742371	18742864	MACS_peak_599	688.27
Chr1	18757767	18758316	MACS_peak_600	66.83
Chr1	18771106	18771830	MACS_peak_601_MACS_peak_602	71.6916
Chr1	18782105	18782628	MACS_peak_603	58.49
Chr1	18864572	18866102	MACS_peak_604	88.72
Chr1	18870547	18872652	MACS_peak_605	400.41
Chr1	18915161	18915404	MACS_peak_606	62.56
Chr1	18920482	18921116	MACS_peak_607	67.8
Chr1	18926533	18927470	MACS_peak_608	80.12
Chr1	18953449	18955007	MACS_peak_609	935.27
Chr1	18962511	18969795	MACS_peak_610_MACS_peak_611_MACS_peak_612	594.41
Chr1	18987663	18989261	MACS_peak_613	115.45
Chr1	19009612	19010216	MACS_peak_614	86.89
Chr1	19021042	19022023	MACS_peak_615	110.07
Chr1	19036460	19038980	MACS_peak_616	215.97
Chr1	19074605	19076316	MACS_peak_617	124.59
Chr1	19104278	19105201	MACS_peak_618	54.76
Chr1	19122234	19124166	MACS_peak_619	65.24
Chr1	19125522	19128064	MACS_peak_620	80.59
Chr1	19140631	19143359	MACS_peak_621_MACS_peak_622_MACS_peak_623	116.259
Chr1	19150093	19151791	MACS_peak_624	162.23
Chr1	19153949	19155253	MACS_peak_625	165.43
Chr1	19160334	19161742	MACS_peak_626	239.45
Chr1	19200296	19200709	MACS_peak_627	58.84
Chr1	19359745	19360062	MACS_peak_628	287.71
Chr1	19484546	19485093	MACS_peak_629	52.46
Chr1	19488979	19489525	MACS_peak_630	63.46
Chr1	19529089	19529445	MACS_peak_631	94.15
Chr1	19530284	19530732	MACS_peak_632	85.51
Chr1	19610096	19610481	MACS_peak_633	50.88
Chr1	19641058	19641402	MACS_peak_634	67.4
Chr1	19655995	19656726	MACS_peak_635	174.44
Chr1	19697303	19697783	MACS_peak_636	59.19
Chr1	19736598	19737114	MACS_peak_637	75.43
Chr1	19738000	19738370	MACS_peak_638	68.76
Chr1	19812199	19812875	MACS_peak_639	130.78
Chr1	19821480	19822189	MACS_peak_640	74.79
Chr1	19850237	19851521	MACS_peak_641	86.3
Chr1	19856594	19856885	MACS_peak_642	56.29
Chr1	19871276	19871690	MACS_peak_643	190.92
Chr1	19880041	19880649	MACS_peak_644	979.98
Chr1	19913142	19914685	MACS_peak_645_MACS_peak_646	243.423
Chr1	19987791	19988472	MACS_peak_647	615.6
Chr1	20078122	20078334	MACS_peak_648	57.91
Chr1	20090707	20090913	MACS_peak_650	54.22
Chr1	20236046	20236792	MACS_peak_651_MACS_peak_652	146.826
Chr1	20549636	20549918	MACS_peak_653	284.43
Chr1	20618488	20618726	MACS_peak_654	55.98
Chr1	20720716	20720967	MACS_peak_656	79.45
Chr1	20793603	20794092	MACS_peak_657	428.14
Chr1	20841855	20842095	MACS_peak_658	95.89
Chr1	20952421	20952692	MACS_peak_660	86.57
Chr1	21024381	21026912	MACS_peak_661_MACS_peak_662_MACS_peak_663	537.861
Chr1	21251037	21251290	MACS_peak_664	51.82
Chr1	21364511	21364742	MACS_peak_665	95.41
Chr1	21456913	21457351	MACS_peak_666_MACS_peak_667	85.4708
Chr1	21505122	21505385	MACS_peak_669	72.84
Chr1	21512681	21512957	MACS_peak_670	54.41
Chr1	21513338	21513908	MACS_peak_671	58.39
Chr1	21558915	21559303	MACS_peak_672	59.45
Chr1	21707507	21707787	MACS_peak_673	86.12
Chr1	21762738	21763418	MACS_peak_674_MACS_peak_675	212.756
Chr1	21910767	21911027	MACS_peak_676	79.41
Chr1	22055680	22056140	MACS_peak_677	141.99
Chr1	22073753	22074364	MACS_peak_678	136.17
Chr1	22104173	22104950	MACS_peak_679	263.14
Chr1	22116083	22116518	MACS_peak_681_MACS_peak_682	72.5437
Chr1	22177266	22177497	MACS_peak_683	61.44
Chr1	22199022	22200427	MACS_peak_684_MACS_peak_685	834.322
Chr1	22263834	22264187	MACS_peak_686	94.22
Chr1	22445574	22445817	MACS_peak_688	55.08
Chr1	22662876	22663113	MACS_peak_689	84.53
Chr1	22702729	22703107	MACS_peak_690	138.85
Chr1	22783447	22784114	MACS_peak_691	129.43
Chr1	22810792	22811011	MACS_peak_692	55.76
Chr1	22866994	22867421	MACS_peak_693	185.57
Chr1	22893344	22893797	MACS_peak_694	164.65
Chr1	22936471	22936701	MACS_peak_695	81.02
Chr1	22986318	22986560	MACS_peak_696	54.86
Chr1	22994741	22994984	MACS_peak_697	88.42
Chr1	23016952	23017193	MACS_peak_698	73.81
Chr1	23102909	23103381	MACS_peak_700	205.86
Chr1	23114781	23115187	MACS_peak_701	162.29
Chr1	23144756	23145231	MACS_peak_702	241.17
Chr1	23231143	23231401	MACS_peak_703	77.89
Chr1	23234584	23234904	MACS_peak_704	59.45
Chr1	23266684	23267190	MACS_peak_706	81.29
Chr1	23425625	23426311	MACS_peak_709_MACS_peak_710	92.5854
Chr1	23539856	23540149	MACS_peak_711	119.05
Chr1	23567727	23568911	MACS_peak_712	2576.42
Chr1	23633110	23633838	MACS_peak_713_MACS_peak_714	78.9649
Chr1	23658762	23659179	MACS_peak_715	167.86
Chr1	23696887	23697423	MACS_peak_716	211.74
Chr1	23728161	23728781	MACS_peak_717	156.57
Chr1	23756414	23756685	MACS_peak_718	61.74
Chr1	23765108	23765545	MACS_peak_719	166.95
Chr1	23816668	23817482	MACS_peak_720	114.83
Chr1	23823528	23823887	MACS_peak_721	52.83
Chr1	23826451	23826844	MACS_peak_722	78.89
Chr1	23848979	23849242	MACS_peak_724	118.78
Chr1	23851587	23852542	MACS_peak_725	274.45
Chr1	23855060	23855339	MACS_peak_726	69.69
Chr1	23941914	23942877	MACS_peak_727	256.54
Chr1	23953364	23954188	MACS_peak_728	174.76
Chr1	23956461	23956669	MACS_peak_729	55.47
Chr1	23996017	23996358	MACS_peak_730	71.59
Chr1	24018068	24018381	MACS_peak_731	95.05
Chr1	24029961	24030558	MACS_peak_732	141.35
Chr1	24044803	24045191	MACS_peak_733	325.59
Chr1	24045762	24046359	MACS_peak_734	131.78
Chr1	24113396	24113891	MACS_peak_735	148.48
Chr1	24179686	24180064	MACS_peak_736	188.05
Chr1	24222534	24222877	MACS_peak_737	59.75
Chr1	24458731	24458962	MACS_peak_738	56.39
Chr1	24572110	24572398	MACS_peak_741	377.36
Chr1	24615206	24615506	MACS_peak_742	64.82
Chr1	24637366	24638060	MACS_peak_743	224.74
Chr1	24647510	24648131	MACS_peak_744	583.65
Chr1	25016939	25017141	MACS_peak_745	53.21
Chr1	25299478	25299801	MACS_peak_746	52.04
Chr1	25347195	25347556	MACS_peak_748	210.75
Chr1	25426443	25426771	MACS_peak_749	61.86
Chr1	25464276	25464587	MACS_peak_750	92.21
Chr1	25476873	25477157	MACS_peak_751	50.08
Chr1	25509942	25510453	MACS_peak_752	151.8
Chr1	25513977	25514397	MACS_peak_753	444.31
Chr1	25521258	25521499	MACS_peak_754	100.61
Chr1	25634470	25634719	MACS_peak_755	51.08
Chr1	25635982	25636368	MACS_peak_756	107.73
Chr1	25645012	25645300	MACS_peak_757	52.55
Chr1	25655052	25655462	MACS_peak_758	90.94
Chr1	25669260	25669947	MACS_peak_759_MACS_peak_760	66.3241
Chr1	25677508	25678148	MACS_peak_761	151.78
Chr1	25829061	25829458	MACS_peak_762	425.8
Chr1	25880582	25881326	MACS_peak_763	348.7
Chr1	25905472	25905838	MACS_peak_764	550.15
Chr1	25929942	25930662	MACS_peak_765	823.8
Chr1	25959651	25959863	MACS_peak_766	52.42
Chr1	26025847	26026220	MACS_peak_767	83.25
Chr1	26028233	26028510	MACS_peak_768	76.81
Chr1	26039477	26039885	MACS_peak_771	119.33
Chr1	26041112	26042367	MACS_peak_772_MACS_peak_773_MACS_peak_774	167.248
Chr1	26057626	26057839	MACS_peak_775	51.81
Chr1	26070883	26071644	MACS_peak_776	530.71
Chr1	26101661	26102424	MACS_peak_777	516.76
Chr1	26216451	26216696	MACS_peak_780	269.89
Chr1	26326652	26327673	MACS_peak_781_MACS_peak_782	180.483
Chr1	26330915	26331349	MACS_peak_783	91.15
Chr1	26427647	26427870	MACS_peak_784	62.59
Chr1	26455300	26455694	MACS_peak_785	266.76
Chr1	26505862	26506109	MACS_peak_786	74.37
Chr1	26513243	26513621	MACS_peak_787	58.87
Chr1	26514221	26514663	MACS_peak_788	70.13
Chr1	26556486	26556778	MACS_peak_789	83.44
Chr1	26626735	26627654	MACS_peak_791	396.26
Chr1	26628601	26629260	MACS_peak_792_MACS_peak_793	53.4235
Chr1	26662470	26662744	MACS_peak_794	50.08
Chr1	26690866	26691180	MACS_peak_795	87.8
Chr1	26701785	26702137	MACS_peak_796	292.99
Chr1	26733226	26733985	MACS_peak_797_MACS_peak_798	420.572
Chr1	26743387	26744200	MACS_peak_799_MACS_peak_800	81.8826
Chr1	26797921	26798719	MACS_peak_801	362.29
Chr1	26822803	26823050	MACS_peak_802	64.44
Chr1	26830609	26830964	MACS_peak_803	59.99
Chr1	26832155	26833407	MACS_peak_804_MACS_peak_805_MACS_peak_806	131.278
Chr1	26862891	26863545	MACS_peak_807_MACS_peak_808	93.3683
Chr1	26882957	26883361	MACS_peak_810_MACS_peak_811	60.508
Chr1	26899430	26900423	MACS_peak_812_MACS_peak_813_MACS_peak_814	196.843
Chr1	26901196	26901792	MACS_peak_815_MACS_peak_816	92.9282
Chr1	26916989	26917443	MACS_peak_817	126.58
Chr1	26936102	26936621	MACS_peak_818	113.31
Chr1	26938588	26938967	MACS_peak_819	74.8
Chr1	26940444	26941838	MACS_peak_820_MACS_peak_821	161.965
Chr1	26996434	26996638	MACS_peak_822	52.4
Chr1	27026819	27027037	MACS_peak_823	65.02
Chr1	27054574	27054783	MACS_peak_824	82.91
Chr1	27108449	27108766	MACS_peak_825	50.23
Chr1	27113733	27114046	MACS_peak_826	72.67
Chr1	27133186	27133584	MACS_peak_827	78.03
Chr1	27165833	27166420	MACS_peak_829	170.55
Chr1	27170532	27170805	MACS_peak_830	53.37
Chr1	27214779	27214985	MACS_peak_832	58.77
Chr1	27311908	27312570	MACS_peak_834_MACS_peak_835	56.8733
Chr1	27357016	27357403	MACS_peak_837	64.11
Chr1	27383658	27384032	MACS_peak_838	55.12
Chr1	27399942	27400313	MACS_peak_839	102.4
Chr1	27444612	27444857	MACS_peak_840	62.24
Chr1	27492422	27492679	MACS_peak_841	66.82
Chr1	27543995	27544398	MACS_peak_842	131.93
Chr1	27578965	27579290	MACS_peak_844	114.24
Chr1	27602159	27602421	MACS_peak_845	99.76
Chr1	27611550	27611753	MACS_peak_846	66.88
Chr1	27629408	27629729	MACS_peak_847	107.96
Chr1	27632008	27632414	MACS_peak_848	113.76
Chr1	27640101	27640329	MACS_peak_849	64.06
Chr1	27653356	27653619	MACS_peak_850	166.72
Chr1	27681758	27682019	MACS_peak_851	87.82
Chr1	27772069	27772604	MACS_peak_852_MACS_peak_853	77.6247
Chr1	27842365	27842884	MACS_peak_855	195.74
Chr1	27866487	27867196	MACS_peak_856	246.9
Chr1	27935587	27935826	MACS_peak_857	130.05
Chr1	27946941	27947274	MACS_peak_858	294.6
Chr1	27957273	27957641	MACS_peak_859	56.36
Chr1	27959215	27960151	MACS_peak_860	440.05
Chr1	27969582	27969825	MACS_peak_861	90.7
Chr1	27991226	27991705	MACS_peak_862	111.74
Chr1	28014318	28014607	MACS_peak_863	52.68
Chr1	28016182	28016729	MACS_peak_864	61.38
Chr1	28025004	28025284	MACS_peak_865	76.86
Chr1	28030638	28030922	MACS_peak_866	69.81
Chr1	28075213	28078198	MACS_peak_867_MACS_peak_868	2489.93
Chr1	28095853	28096341	MACS_peak_869	75.73
Chr1	28104311	28104983	MACS_peak_870	464.58
Chr1	28144596	28144948	MACS_peak_871	343.23
Chr1	28158936	28159261	MACS_peak_872	102.58
Chr1	28174767	28175301	MACS_peak_873	110.14
Chr1	28180630	28181065	MACS_peak_874	125
Chr1	28222903	28223602	MACS_peak_875	168.87
Chr1	28234786	28235138	MACS_peak_876	59.73
Chr1	28250246	28250544	MACS_peak_877	559.61
Chr1	28317675	28317946	MACS_peak_878	84.26
Chr1	28328141	28328509	MACS_peak_879	88.74
Chr1	28395205	28396162	MACS_peak_880	1233.21
Chr1	28406818	28407073	MACS_peak_881	59.98
Chr1	28430566	28430999	MACS_peak_882	81
Chr1	28459025	28459726	MACS_peak_883	223.48
Chr1	28464527	28464863	MACS_peak_884	54.39
Chr1	28518666	28519547	MACS_peak_885	2206.38
Chr1	28543485	28543941	MACS_peak_886	307.37
Chr1	28546726	28547151	MACS_peak_887	86.88
Chr1	28550740	28551228	MACS_peak_888	60.26
Chr1	28554172	28554673	MACS_peak_889	178.4
Chr1	28603417	28603844	MACS_peak_891	60.62
Chr1	28696035	28696708	MACS_peak_892	105.08
Chr1	28705705	28706323	MACS_peak_893	919.8
Chr1	28712400	28712729	MACS_peak_894	56.34
Chr1	28728623	28728937	MACS_peak_895	245.67
Chr1	28729358	28729625	MACS_peak_896	83.73
Chr1	28730224	28730436	MACS_peak_897	60.01
Chr1	28804453	28805132	MACS_peak_898_MACS_peak_899	67.6165
Chr1	28998882	28999309	MACS_peak_901	68.88
Chr1	29001398	29001840	MACS_peak_902	53.4
Chr1	29009137	29009402	MACS_peak_903	57.07
Chr1	29009727	29010054	MACS_peak_904	55.41
Chr1	29010659	29010883	MACS_peak_905	106.33
Chr1	29018128	29018773	MACS_peak_906	82.77
Chr1	29085876	29086723	MACS_peak_907	247.39
Chr1	29087048	29087442	MACS_peak_908	128.57
Chr1	29093373	29093889	MACS_peak_909	116.24
Chr1	29117310	29117791	MACS_peak_910	101.08
Chr1	29122160	29122491	MACS_peak_911	67.98
Chr1	29194024	29194893	MACS_peak_913_MACS_peak_914	259.901
Chr1	29220908	29222124	MACS_peak_915	545.92
Chr1	29238535	29239239	MACS_peak_916	302.18
Chr1	29245196	29245397	MACS_peak_917	50.27
Chr1	29388188	29389151	MACS_peak_919	1495.84
Chr1	29432204	29432455	MACS_peak_920	74.99
Chr1	29451006	29451989	MACS_peak_921_MACS_peak_922	109.168
Chr1	29452542	29452896	MACS_peak_923	66.75
Chr1	29461909	29462277	MACS_peak_924	113.83
Chr1	29463938	29464482	MACS_peak_925	108.72
Chr1	29491462	29492387	MACS_peak_927_MACS_peak_928	377.629
Chr1	29557190	29557588	MACS_peak_929	145.01
Chr1	29564172	29564431	MACS_peak_930	79.3
Chr1	29570586	29571559	MACS_peak_931	337.52
Chr1	29583914	29584489	MACS_peak_933	145.67
Chr1	29584764	29585145	MACS_peak_934	87
Chr1	29585933	29586155	MACS_peak_935	64.7
Chr1	29605811	29606314	MACS_peak_936	92.83
Chr1	29606985	29607210	MACS_peak_937	61.92
Chr1	29630012	29630292	MACS_peak_938	59.27
Chr1	29632135	29632557	MACS_peak_939	91.87
Chr1	29634603	29635707	MACS_peak_940_MACS_peak_941	145.659
Chr1	29637386	29638526	MACS_peak_942_MACS_peak_943	88.7723
Chr1	29642554	29643127	MACS_peak_944_MACS_peak_945	76.0835
Chr1	29646564	29647583	MACS_peak_946_MACS_peak_947_MACS_peak_948	168.583
Chr1	29687169	29687466	MACS_peak_949	91.93
Chr1	29714298	29715264	MACS_peak_950	162.09
Chr1	29741988	29743008	MACS_peak_951_MACS_peak_952	171.848
Chr1	29747349	29747951	MACS_peak_953	62.76
Chr1	29748403	29748879	MACS_peak_954	93.59
Chr1	29749818	29750183	MACS_peak_955	50.13
Chr1	29832466	29833046	MACS_peak_956	103.02
Chr1	29843916	29844348	MACS_peak_957	53.95
Chr1	29852744	29853247	MACS_peak_958	105.1
Chr1	29854141	29855302	MACS_peak_959	125.33
Chr1	29873658	29874093	MACS_peak_960	80.3
Chr1	29896270	29896670	MACS_peak_961	67.4
Chr1	29898025	29898538	MACS_peak_962	159.66
Chr1	29935762	29936529	MACS_peak_963	76.81
Chr1	29950658	29951399	MACS_peak_964	60.61
Chr1	29952023	29952534	MACS_peak_965	95.95
Chr1	29977060	29977425	MACS_peak_966	365.97
Chr1	29978475	29979062	MACS_peak_967	137.73
Chr1	29997182	29997871	MACS_peak_968	174.61
Chr1	30003626	30005345	MACS_peak_969	414.19
Chr1	30009278	30012351	MACS_peak_970_MACS_peak_971_MACS_peak_972	879.64
Chr1	30014364	30014837	MACS_peak_973	110.47
Chr1	30018766	30019095	MACS_peak_974	56.71
Chr1	30019975	30021657	MACS_peak_975_MACS_peak_976_MACS_peak_977	116.26
Chr1	30033414	30033736	MACS_peak_978	63.41
Chr1	30038929	30039328	MACS_peak_979	69.79
Chr1	30039736	30040345	MACS_peak_980_MACS_peak_981	53.1378
Chr1	30041361	30042531	MACS_peak_982_MACS_peak_983	151.052
Chr1	30044872	30045664	MACS_peak_984	233.44
Chr1	30052610	30053095	MACS_peak_985	121.43
Chr1	30056333	30056653	MACS_peak_986	53.01
Chr1	30084032	30084796	MACS_peak_987_MACS_peak_988	133.303
Chr1	30085605	30085818	MACS_peak_989	50.46
Chr1	30086630	30086943	MACS_peak_990	74.49
Chr1	30097686	30099019	MACS_peak_991_MACS_peak_992	146.213
Chr1	30099522	30099850	MACS_peak_993	56.66
Chr1	30100797	30101655	MACS_peak_994	150.34
Chr1	30108548	30109003	MACS_peak_995	72.7
Chr1	30117437	30117807	MACS_peak_996	74.56
Chr1	30118977	30119537	MACS_peak_997	366.41
Chr1	30126666	30126917	MACS_peak_998	57
Chr1	30128301	30129552	MACS_peak_999	218.79
Chr1	30148710	30149034	MACS_peak_1000	63.07
Chr1	30171570	30171914	MACS_peak_1001	82.82
Chr1	30172224	30172585	MACS_peak_1002	83.96
Chr1	30188403	30188825	MACS_peak_1003	73.62
Chr1	30191848	30192173	MACS_peak_1004	50.5
Chr1	30194853	30195459	MACS_peak_1005_MACS_peak_1006	59.0084
Chr1	30196799	30197066	MACS_peak_1007	56.12
Chr1	30197347	30197886	MACS_peak_1008	113
Chr1	30208059	30208324	MACS_peak_1009	66.77
Chr1	30208728	30209497	MACS_peak_1010	177
Chr1	30226119	30226496	MACS_peak_1011	119.99
Chr1	30241748	30243095	MACS_peak_1012	1809.3
Chr1	30247424	30248299	MACS_peak_1013	132.3
Chr1	30293767	30294098	MACS_peak_1014	66.37
Chr1	30300244	30300460	MACS_peak_1015	55.8
Chr1	30303428	30304002	MACS_peak_1016	309.24
Chr1	30318618	30319066	MACS_peak_1017	60.56
Chr1	30322858	30323196	MACS_peak_1018	88.42
Chr1	30358738	30359192	MACS_peak_1019	68.96
Chr2	1866	2067	MACS_peak_1021	217.67
Chr2	2542	2981	MACS_peak_1022_MACS_peak_1023	183.414
Chr2	3373	3594	MACS_peak_1024	617.15
Chr2	5579	6157	MACS_peak_1025_MACS_peak_1026	440.331
Chr2	9916	10243	MACS_peak_1028	629.44
Chr2	37099	37634	MACS_peak_1029	83.49
Chr2	78046	78798	MACS_peak_1030_MACS_peak_1031	162.167
Chr2	95029	95595	MACS_peak_1032_MACS_peak_1033	68.1954
Chr2	95944	96577	MACS_peak_1034	91.17
Chr2	115143	117343	MACS_peak_1035	682.03
Chr2	120440	120923	MACS_peak_1036	69.11
Chr2	149199	149738	MACS_peak_1037	86.29
Chr2	175338	176204	MACS_peak_1038	265.01
Chr2	182231	183186	MACS_peak_1039	847.03
Chr2	214262	214683	MACS_peak_1040	594.39
Chr2	216721	217197	MACS_peak_1041	122.34
Chr2	255786	256980	MACS_peak_1042	183.98
Chr2	259075	259298	MACS_peak_1043	103.13
Chr2	274053	274815	MACS_peak_1044	146.42
Chr2	278913	281207	MACS_peak_1045	292.7
Chr2	284762	286109	MACS_peak_1046	273.44
Chr2	291736	292576	MACS_peak_1047	171.45
Chr2	306902	308417	MACS_peak_1048	50.5
Chr2	319890	320489	MACS_peak_1049	80.63
Chr2	322917	324976	MACS_peak_1050_MACS_peak_1051	277.024
Chr2	332406	333007	MACS_peak_1052	58.64
Chr2	348825	349330	MACS_peak_1054	50.34
Chr2	377288	378557	MACS_peak_1055	293.91
Chr2	442450	444198	MACS_peak_1056_MACS_peak_1057	484.652
Chr2	553388	555465	MACS_peak_1058	53.09
Chr2	698470	699034	MACS_peak_1060	406.9
Chr2	772176	773810	MACS_peak_1061	402.84
Chr2	789278	790877	MACS_peak_1062	77.69
Chr2	824944	825235	MACS_peak_1063	51.03
Chr2	859431	860003	MACS_peak_1064	80.85
Chr2	867382	867947	MACS_peak_1065	129.42
Chr2	941974	942552	MACS_peak_1066	71.3
Chr2	966551	967585	MACS_peak_1067	122.85
Chr2	975842	977279	MACS_peak_1068	62.43
Chr2	1041546	1042060	MACS_peak_1069	74.96
Chr2	1043636	1044527	MACS_peak_1070_MACS_peak_1071	255.662
Chr2	1272638	1272914	MACS_peak_1072	50.51
Chr2	1309573	1310598	MACS_peak_1073	137.05
Chr2	1335472	1336193	MACS_peak_1074	97.09
Chr2	1338251	1338855	MACS_peak_1075	112.8
Chr2	1342331	1342598	MACS_peak_1076	57.9
Chr2	1364334	1364603	MACS_peak_1077	50.65
Chr2	1378704	1378991	MACS_peak_1078	70.2
Chr2	1489635	1490021	MACS_peak_1080	294.87
Chr2	1547623	1547957	MACS_peak_1081	270.37
Chr2	1704736	1705505	MACS_peak_1082_MACS_peak_1083	221.644
Chr2	2216073	2216299	MACS_peak_1085	60.59
Chr2	2269956	2270280	MACS_peak_1086	59.3
Chr2	2355010	2355548	MACS_peak_1087	92.6
Chr2	2359225	2360538	MACS_peak_1088	92.72
Chr2	2361683	2362235	MACS_peak_1089	108.22
Chr2	2377433	2378791	MACS_peak_1090_MACS_peak_1091	1778.06
Chr2	2380702	2381033	MACS_peak_1092	62.86
Chr2	2392559	2394235	MACS_peak_1093	170.33
Chr2	2394727	2396893	MACS_peak_1094_MACS_peak_1095	287.628
Chr2	2403661	2404666	MACS_peak_1096	117.87
Chr2	2419378	2422641	MACS_peak_1097_MACS_peak_1098_MACS_peak_1099_MACS_peak_1100_MACS_peak_1101_MACS_peak_1102_MACS_peak_1103	641.238
Chr2	2476772	2478017	MACS_peak_1104	61.62
Chr2	2483366	2484498	MACS_peak_1105	58.01
Chr2	2561609	2562868	MACS_peak_1106_MACS_peak_1107	207.336
Chr2	2585993	2587533	MACS_peak_1108_MACS_peak_1109	63.6758
Chr2	2587817	2589048	MACS_peak_1110_MACS_peak_1111	108.191
Chr2	2704226	2704514	MACS_peak_1112	64.3
Chr2	2739723	2743553	MACS_peak_1113	168.85
Chr2	2771764	2772599	MACS_peak_1114_MACS_peak_1115	87.1955
Chr2	2775474	2775955	MACS_peak_1116	58.41
Chr2	2780841	2781594	MACS_peak_1117	56.85
Chr2	2790599	2792073	MACS_peak_1118	67.48
Chr2	2804479	2805167	MACS_peak_1119	133.76
Chr2	2805693	2808468	MACS_peak_1120_MACS_peak_1121_MACS_peak_1122	1171.06
Chr2	2809413	2810446	MACS_peak_1123	116.61
Chr2	2812349	2813966	MACS_peak_1124	221.54
Chr2	2815013	2817033	MACS_peak_1125	89.82
Chr2	2830956	2837082	MACS_peak_1126_MACS_peak_1127	902.524
Chr2	2872985	2873250	MACS_peak_1128	68.34
Chr2	2875975	2876217	MACS_peak_1129	50.34
Chr2	2879381	2879835	MACS_peak_1130	60.92
Chr2	2932383	2933870	MACS_peak_1131	240.78
Chr2	2996621	2998006	MACS_peak_1132	95.43
Chr2	3000762	3002254	MACS_peak_1133	55.15
Chr2	3003467	3004891	MACS_peak_1134	85.24
Chr2	3245299	3245584	MACS_peak_1136_MACS_peak_1137	292.531
Chr2	3260355	3260737	MACS_peak_1140_MACS_peak_1141	177.885
Chr2	3275766	3276228	MACS_peak_1151_MACS_peak_1152	291.27
Chr2	3278694	3279024	MACS_peak_1153	518.72
Chr2	3283443	3283673	MACS_peak_1156	465.65
Chr2	3291943	3292287	MACS_peak_1157_MACS_peak_1158	212.662
Chr2	3313193	3313801	MACS_peak_1168_MACS_peak_1169	1188.6
Chr2	3314209	3315064	MACS_peak_1170_MACS_peak_1171	1633.25
Chr2	3332017	3332453	MACS_peak_1181_MACS_peak_1182	160.659
Chr2	3332791	3333303	MACS_peak_1183_MACS_peak_1184_MACS_peak_1185	181.044
Chr2	3334100	3335719	MACS_peak_1187_MACS_peak_1188_MACS_peak_1189_MACS_peak_1190	602.762
Chr2	3337564	3338281	MACS_peak_1192_MACS_peak_1193_MACS_peak_1194	268.136
Chr2	3356793	3357083	MACS_peak_1202_MACS_peak_1203	171.625
Chr2	3396988	3397383	MACS_peak_1218	611.22
Chr2	3398581	3399335	MACS_peak_1219_MACS_peak_1220_MACS_peak_1221_MACS_peak_1222	420.549
Chr2	3399983	3400428	MACS_peak_1223_MACS_peak_1224	705.572
Chr2	3433956	3434419	MACS_peak_1235_MACS_peak_1236	205.118
Chr2	3438292	3438732	MACS_peak_1237_MACS_peak_1238	177.773
Chr2	3459000	3459309	MACS_peak_1244_MACS_peak_1245	229.67
Chr2	3469319	3469521	MACS_peak_1252	172.11
Chr2	3478160	3478420	MACS_peak_1258	484.53
Chr2	3486022	3486705	MACS_peak_1263_MACS_peak_1264_MACS_peak_1265	380.773
Chr2	3488512	3489172	MACS_peak_1267_MACS_peak_1268_MACS_peak_1269	193.244
Chr2	3490897	3491196	MACS_peak_1271	417.28
Chr2	3493237	3493458	MACS_peak_1273	422.74
Chr2	3497016	3497666	MACS_peak_1275_MACS_peak_1276_MACS_peak_1277	346.229
Chr2	3500756	3500964	MACS_peak_1281	458.95
Chr2	3526879	3527530	MACS_peak_1285	742.06
Chr2	3537309	3537745	MACS_peak_1286	53.01
Chr2	3566374	3571794	MACS_peak_1287	1226.42
Chr2	3584738	3586454	MACS_peak_1288	1754.95
Chr2	3704822	3705233	MACS_peak_1289	81.18
Chr2	3761627	3761916	MACS_peak_1290	210.39
Chr2	3823517	3823964	MACS_peak_1291	65.2
Chr2	3943933	3944643	MACS_peak_1292	54.52
Chr2	3974510	3974904	MACS_peak_1293	82.71
Chr2	3977943	3982259	MACS_peak_1294_MACS_peak_1295	313.089
Chr2	3983305	3984387	MACS_peak_1296	75.45
Chr2	4124071	4124295	MACS_peak_1297	71.17
Chr2	4178654	4178884	MACS_peak_1298	53.76
Chr2	4283749	4283957	MACS_peak_1299	108.17
Chr2	4293988	4294234	MACS_peak_1300	75.31
Chr2	4739574	4739775	MACS_peak_1303	86.21
Chr2	4740995	4741260	MACS_peak_1305	80.68
Chr2	4802827	4803211	MACS_peak_1306	60.04
Chr2	4895618	4895976	MACS_peak_1307	219.75
Chr2	5079002	5079384	MACS_peak_1309	87.29
Chr2	5081662	5083271	MACS_peak_1310	244.88
Chr2	5105683	5105964	MACS_peak_1311	61.73
Chr2	5298796	5299180	MACS_peak_1313	83.51
Chr2	5302000	5302347	MACS_peak_1314	133.76
Chr2	5366415	5366618	MACS_peak_1316	54.14
Chr2	5380973	5381683	MACS_peak_1317_MACS_peak_1318	85.4552
Chr2	5382878	5384310	MACS_peak_1319_MACS_peak_1320	81.7954
Chr2	5783307	5783536	MACS_peak_1321	56.17
Chr2	6031358	6032566	MACS_peak_1322	2279.52
Chr2	6036527	6037467	MACS_peak_1323_MACS_peak_1324	108.279
Chr2	6189868	6190086	MACS_peak_1325	73.29
Chr2	6529718	6529945	MACS_peak_1326	85.35
Chr2	6611443	6611880	MACS_peak_1327	168.74
Chr2	6643686	6644082	MACS_peak_1328	91.5
Chr2	6650809	6651384	MACS_peak_1329	87.62
Chr2	6666535	6667715	MACS_peak_1330	147.32
Chr2	6671899	6672983	MACS_peak_1331	88.96
Chr2	6677285	6677598	MACS_peak_1332	57.89
Chr2	6717784	6718727	MACS_peak_1333	221.35
Chr2	6724756	6727776	MACS_peak_1334	57.87
Chr2	6774119	6775874	MACS_peak_1335	138.08
Chr2	6785991	6786920	MACS_peak_1336	62.27
Chr2	6832800	6833763	MACS_peak_1337	91.94
Chr2	6834070	6835349	MACS_peak_1338	57.54
Chr2	6845139	6848449	MACS_peak_1339	75.54
Chr2	6862808	6864113	MACS_peak_1340	371.97
Chr2	6908704	6909378	MACS_peak_1341	76
Chr2	7073220	7073519	MACS_peak_1342	120.2
Chr2	7113709	7115959	MACS_peak_1343	298.37
Chr2	7116804	7118754	MACS_peak_1344	730.13
Chr2	7137076	7139078	MACS_peak_1345	65.85
Chr2	7144671	7145242	MACS_peak_1346	64.41
Chr2	7150722	7152927	MACS_peak_1347	1193.19
Chr2	7200609	7201428	MACS_peak_1349	1405.22
Chr2	7209618	7210282	MACS_peak_1350	64.33
Chr2	7211106	7212159	MACS_peak_1351	66.04
Chr2	7213401	7214920	MACS_peak_1352	911.65
Chr2	7217675	7218112	MACS_peak_1353	63.83
Chr2	7218855	7219381	MACS_peak_1354	52.68
Chr2	7220802	7221082	MACS_peak_1355	78.25
Chr2	7224764	7226745	MACS_peak_1356_MACS_peak_1357	265.659
Chr2	7230461	7231813	MACS_peak_1358	425.12
Chr2	7248160	7248648	MACS_peak_1359	65.26
Chr2	7275452	7276300	MACS_peak_1360	68.48
Chr2	7282023	7283829	MACS_peak_1361	399.61
Chr2	7319908	7320292	MACS_peak_1362	68.29
Chr2	7397093	7399827	MACS_peak_1363_MACS_peak_1364_MACS_peak_1365	370.227
Chr2	7459181	7459620	MACS_peak_1366	85.76
Chr2	7484406	7485384	MACS_peak_1367_MACS_peak_1368	163.669
Chr2	7494867	7495792	MACS_peak_1369	929.85
Chr2	7508605	7509444	MACS_peak_1370	133.44
Chr2	7556219	7556533	MACS_peak_1371	145.31
Chr2	7564474	7565030	MACS_peak_1372	110.46
Chr2	7610819	7611172	MACS_peak_1373	111.82
Chr2	7627343	7628387	MACS_peak_1374	519.94
Chr2	7655563	7656212	MACS_peak_1375_MACS_peak_1376	82.7126
Chr2	7674317	7674584	MACS_peak_1378	52.49
Chr2	7762289	7762832	MACS_peak_1379	90.96
Chr2	7763696	7765123	MACS_peak_1380_MACS_peak_1381	277.774
Chr2	7767070	7767632	MACS_peak_1382	180.67
Chr2	7837154	7837453	MACS_peak_1383	54.36
Chr2	7842096	7842427	MACS_peak_1384	74.07
Chr2	7918541	7919496	MACS_peak_1385	1572.6
Chr2	7937447	7937913	MACS_peak_1386	77.23
Chr2	7946058	7947041	MACS_peak_1387	745.66
Chr2	8027205	8027771	MACS_peak_1388	141
Chr2	8031560	8032025	MACS_peak_1389	109.8
Chr2	8063423	8064253	MACS_peak_1390	281.17
Chr2	8140244	8140654	MACS_peak_1391	193.8
Chr2	8294121	8294420	MACS_peak_1392	51.26
Chr2	8324641	8325124	MACS_peak_1393	102.87
Chr2	8336091	8336347	MACS_peak_1394	81.19
Chr2	8426333	8426551	MACS_peak_1396	67.37
Chr2	8431508	8431773	MACS_peak_1397	79.83
Chr2	8446871	8447124	MACS_peak_1398	89.08
Chr2	8470660	8470982	MACS_peak_1399	76.21
Chr2	8471335	8471592	MACS_peak_1400	68.15
Chr2	8550536	8551489	MACS_peak_1401	2140.11
Chr2	8644585	8645031	MACS_peak_1402	95.25
Chr2	8653009	8653633	MACS_peak_1403	394.5
Chr2	8704738	8706234	MACS_peak_1404_MACS_peak_1405	491.446
Chr2	8736769	8736996	MACS_peak_1407	94.81
Chr2	8741968	8742413	MACS_peak_1408	275.33
Chr2	8775196	8775398	MACS_peak_1409	50.43
Chr2	8792143	8793794	MACS_peak_1410	773.45
Chr2	8901797	8902065	MACS_peak_1413	224.01
Chr2	8923469	8923809	MACS_peak_1414	65.49
Chr2	8927301	8928546	MACS_peak_1415_MACS_peak_1416_MACS_peak_1417	170.009
Chr2	8933968	8934633	MACS_peak_1418_MACS_peak_1419	77.6349
Chr2	8941357	8941732	MACS_peak_1420	55.89
Chr2	8944672	8944956	MACS_peak_1421	65.49
Chr2	8946648	8947012	MACS_peak_1422	63.58
Chr2	8948151	8948513	MACS_peak_1423	51.06
Chr2	8953324	8953584	MACS_peak_1424	51.25
Chr2	8979418	8979801	MACS_peak_1425	63.25
Chr2	8986540	8987072	MACS_peak_1426	61.18
Chr2	8988496	8988957	MACS_peak_1427	88.24
Chr2	8998739	8999548	MACS_peak_1428	218.5
Chr2	9002323	9002687	MACS_peak_1429	94.49
Chr2	9003368	9003782	MACS_peak_1430	101.58
Chr2	9004361	9005190	MACS_peak_1431	171.63
Chr2	9008114	9008524	MACS_peak_1432	68.07
Chr2	9026749	9026961	MACS_peak_1433	57.66
Chr2	9047090	9047539	MACS_peak_1434	88.8
Chr2	9055780	9056124	MACS_peak_1435	95.98
Chr2	9072868	9073446	MACS_peak_1436_MACS_peak_1437	74.534
Chr2	9097874	9098629	MACS_peak_1438_MACS_peak_1439	74.3584
Chr2	9114383	9114760	MACS_peak_1440	71.2
Chr2	9115091	9115491	MACS_peak_1441	130.75
Chr2	9155462	9155812	MACS_peak_1442	66.37
Chr2	9250974	9251352	MACS_peak_1443	100.49
Chr2	9286643	9287016	MACS_peak_1444	215.4
Chr2	9408857	9410266	MACS_peak_1445	1034.09
Chr2	9411624	9412880	MACS_peak_1446	1035.15
Chr2	9538369	9538622	MACS_peak_1447	125.69
Chr2	9541573	9541927	MACS_peak_1448	86.38
Chr2	9625147	9625427	MACS_peak_1449	92.95
Chr2	9645689	9647396	MACS_peak_1450_MACS_peak_1451_MACS_peak_1452	1800.78
Chr2	9696334	9696913	MACS_peak_1453	207.91
Chr2	10063316	10063854	MACS_peak_1454	66.59
Chr2	10120965	10121672	MACS_peak_1455_MACS_peak_1456	112.079
Chr2	10183479	10185089	MACS_peak_1457_MACS_peak_1458	247.398
Chr2	10185572	10186243	MACS_peak_1459	485.06
Chr2	10238144	10238683	MACS_peak_1460	112.64
Chr2	10251675	10251980	MACS_peak_1461	70.53
Chr2	10282046	10282791	MACS_peak_1463	479.69
Chr2	10319678	10320040	MACS_peak_1464	230.57
Chr2	10341617	10342196	MACS_peak_1465	290.88
Chr2	10373819	10374030	MACS_peak_1466	75.87
Chr2	10426716	10427145	MACS_peak_1467	86.88
Chr2	10490531	10491405	MACS_peak_1469	107.7
Chr2	10518396	10519062	MACS_peak_1470	412.24
Chr2	10524301	10524963	MACS_peak_1471	352.51
Chr2	10543501	10544163	MACS_peak_1472	322.53
Chr2	10566639	10567302	MACS_peak_1473	134
Chr2	10574042	10574443	MACS_peak_1474	90.94
Chr2	10610729	10611348	MACS_peak_1475	609.59
Chr2	10684481	10684700	MACS_peak_1476	61.3
Chr2	10722340	10722671	MACS_peak_1477	242.89
Chr2	10848060	10849800	MACS_peak_1478_MACS_peak_1479	242.543
Chr2	11008926	11009263	MACS_peak_1480	105.34
Chr2	11031074	11031385	MACS_peak_1481	57.28
Chr2	11071947	11072714	MACS_peak_1482	165.66
Chr2	11113394	11113717	MACS_peak_1483	54.07
Chr2	11230175	11230459	MACS_peak_1484	81.02
Chr2	11318827	11319058	MACS_peak_1485	72.42
Chr2	11473721	11474054	MACS_peak_1486	443.97
Chr2	11572486	11572992	MACS_peak_1487	105.27
Chr2	11630294	11630735	MACS_peak_1488	70.14
Chr2	11798862	11800711	MACS_peak_1489_MACS_peak_1490	365.354
Chr2	11810329	11810707	MACS_peak_1491	103.98
Chr2	11860719	11861016	MACS_peak_1492	53.21
Chr2	12066921	12067255	MACS_peak_1493	206.38
Chr2	12114351	12115291	MACS_peak_1494_MACS_peak_1495	2480.76
Chr2	12157652	12158146	MACS_peak_1496	307.5
Chr2	12165468	12165784	MACS_peak_1497	99.17
Chr2	12178757	12179293	MACS_peak_1498	91.5
Chr2	12187714	12188228	MACS_peak_1499	50.41
Chr2	12199522	12200101	MACS_peak_1500	55.1
Chr2	12223207	12223564	MACS_peak_1501	384.42
Chr2	12227918	12228124	MACS_peak_1502	52.28
Chr2	12301263	12301605	MACS_peak_1503	71.37
Chr2	12303227	12303927	MACS_peak_1504	991.72
Chr2	12354719	12355392	MACS_peak_1505	122.32
Chr2	12364238	12364530	MACS_peak_1506	64.49
Chr2	12406957	12407329	MACS_peak_1507	150.67
Chr2	12438312	12438526	MACS_peak_1508	68.75
Chr2	12483391	12483605	MACS_peak_1509	62.92
Chr2	12601477	12601730	MACS_peak_1511	229.74
Chr2	12644699	12644982	MACS_peak_1513	85.98
Chr2	12668365	12668590	MACS_peak_1514	160.53
Chr2	12703456	12703699	MACS_peak_1515	262.73
Chr2	12706856	12707459	MACS_peak_1516_MACS_peak_1517	68.9957
Chr2	12708003	12708254	MACS_peak_1518	60.17
Chr2	12710570	12711022	MACS_peak_1519	214.9
Chr2	12784678	12785037	MACS_peak_1520	112.38
Chr2	13014945	13015977	MACS_peak_1524_MACS_peak_1525	139.098
Chr2	13119878	13120834	MACS_peak_1526_MACS_peak_1527	340.013
Chr2	13121706	13122063	MACS_peak_1528	107.22
Chr2	13328982	13329384	MACS_peak_1530	388.78
Chr2	13329917	13331247	MACS_peak_1531_MACS_peak_1532	617.708
Chr2	13357397	13357978	MACS_peak_1533	203.88
Chr2	13390012	13390427	MACS_peak_1534	87.36
Chr2	13409177	13410030	MACS_peak_1535_MACS_peak_1536	317.773
Chr2	13638249	13638578	MACS_peak_1537	97.05
Chr2	13652710	13652993	MACS_peak_1538	67.94
Chr2	13683744	13684069	MACS_peak_1539	51.09
Chr2	13794545	13795447	MACS_peak_1541	1077.85
Chr2	13799053	13799943	MACS_peak_1542	165.06
Chr2	13817216	13817967	MACS_peak_1543	331.31
Chr2	13827701	13828086	MACS_peak_1544	95.05
Chr2	13830651	13830979	MACS_peak_1545	59.04
Chr2	13833608	13833950	MACS_peak_1546	121.93
Chr2	13934564	13934853	MACS_peak_1547	61.73
Chr2	13973999	13974245	MACS_peak_1548	106.34
Chr2	14006347	14006651	MACS_peak_1550	76.94
Chr2	14007207	14008194	MACS_peak_1551	442
Chr2	14156994	14157257	MACS_peak_1554	86.57
Chr2	14159088	14159372	MACS_peak_1555	68.3
Chr2	14217643	14218020	MACS_peak_1556	85.66
Chr2	14317809	14318010	MACS_peak_1557	75.24
Chr2	14325911	14326329	MACS_peak_1558	130.39
Chr2	14376961	14377245	MACS_peak_1559	122.85
Chr2	14393499	14393882	MACS_peak_1560	146.17
Chr2	14488949	14489152	MACS_peak_1561	165.65
Chr2	14748968	14749714	MACS_peak_1565_MACS_peak_1566	100.767
Chr2	14750469	14751038	MACS_peak_1567	207.91
Chr2	14751929	14752969	MACS_peak_1568_MACS_peak_1569	958.21
Chr2	14776016	14776368	MACS_peak_1570	300.52
Chr2	14849828	14850031	MACS_peak_1571	56.2
Chr2	14857437	14857689	MACS_peak_1572	93.05
Chr2	14883284	14883902	MACS_peak_1573_MACS_peak_1574	84.1805
Chr2	14901952	14902203	MACS_peak_1575	66.25
Chr2	14913077	14913414	MACS_peak_1576	114.34
Chr2	14914037	14914307	MACS_peak_1577	90.57
Chr2	14931396	14932049	MACS_peak_1578_MACS_peak_1579	60.9575
Chr2	14932780	14933148	MACS_peak_1580	236.41
Chr2	14964501	14965258	MACS_peak_1581_MACS_peak_1582	106.057
Chr2	15025194	15025611	MACS_peak_1583	73.83
Chr2	15059859	15060725	MACS_peak_1584	299.14
Chr2	15075802	15076281	MACS_peak_1585	376.71
Chr2	15083157	15084117	MACS_peak_1586_MACS_peak_1587	442.954
Chr2	15089819	15091656	MACS_peak_1588_MACS_peak_1589	748.029
Chr2	15127456	15127678	MACS_peak_1591	54.23
Chr2	15158971	15159349	MACS_peak_1592	86.44
Chr2	15192641	15193217	MACS_peak_1594	207.68
Chr2	15490064	15490297	MACS_peak_1595	62.47
Chr2	15506006	15506434	MACS_peak_1596	81.28
Chr2	15558777	15559403	MACS_peak_1597_MACS_peak_1598	120.66
Chr2	15559794	15560105	MACS_peak_1599	118.12
Chr2	15591149	15591413	MACS_peak_1600	66.67
Chr2	15619771	15620044	MACS_peak_1601	80.29
Chr2	15640924	15641154	MACS_peak_1603	63.42
Chr2	15641536	15642299	MACS_peak_1604	537.66
Chr2	15666725	15667017	MACS_peak_1605	172.24
Chr2	15860709	15861282	MACS_peak_1609	418.21
Chr2	15909051	15909821	MACS_peak_1610	850.29
Chr2	16011938	16012153	MACS_peak_1611	59.15
Chr2	16013280	16013533	MACS_peak_1612	55.62
Chr2	16087438	16087758	MACS_peak_1615	51.81
Chr2	16088543	16088875	MACS_peak_1616	65.26
Chr2	16097960	16098238	MACS_peak_1617	54.34
Chr2	16099096	16099323	MACS_peak_1618	72.18
Chr2	16103900	16104113	MACS_peak_1619	57.13
Chr2	16114366	16115149	MACS_peak_1620	323.66
Chr2	16118556	16118992	MACS_peak_1621	83.81
Chr2	16258548	16259968	MACS_peak_1622_MACS_peak_1623_MACS_peak_1624	130.257
Chr2	16303517	16304009	MACS_peak_1625	65.73
Chr2	16321059	16322091	MACS_peak_1626_MACS_peak_1627	121.826
Chr2	16330209	16330454	MACS_peak_1628	65.16
Chr2	16430863	16432164	MACS_peak_1630	2136.36
Chr2	16463422	16464167	MACS_peak_1631_MACS_peak_1632	63.4675
Chr2	16501585	16501831	MACS_peak_1633	75.31
Chr2	16562326	16563081	MACS_peak_1634	117.25
Chr2	16563641	16563850	MACS_peak_1635	53.31
Chr2	16567754	16568067	MACS_peak_1636	71
Chr2	16576270	16576679	MACS_peak_1637	201.29
Chr2	16616968	16617195	MACS_peak_1638	64.75
Chr2	16675104	16675480	MACS_peak_1639	70.27
Chr2	16700642	16701101	MACS_peak_1640	119.68
Chr2	16716587	16718143	MACS_peak_1641_MACS_peak_1642	274.266
Chr2	16728961	16729454	MACS_peak_1643	63.37
Chr2	16745869	16746497	MACS_peak_1644	900.45
Chr2	16766277	16767142	MACS_peak_1646	357.99
Chr2	16786513	16786809	MACS_peak_1647	124.27
Chr2	16803529	16804582	MACS_peak_1648	739.03
Chr2	16811292	16812145	MACS_peak_1649	610.16
Chr2	16813458	16813756	MACS_peak_1650	157.2
Chr2	16830467	16831142	MACS_peak_1651	286.29
Chr2	16865224	16865441	MACS_peak_1652	94.22
Chr2	16956379	16956866	MACS_peak_1654_MACS_peak_1655	136.833
Chr2	16965418	16965752	MACS_peak_1656	121.02
Chr2	16989228	16990297	MACS_peak_1657_MACS_peak_1658	236.709
Chr2	17035832	17036044	MACS_peak_1659	53.12
Chr2	17043959	17044288	MACS_peak_1660	56.51
Chr2	17120596	17121259	MACS_peak_1661	177.95
Chr2	17127636	17128437	MACS_peak_1662_MACS_peak_1663	89.8011
Chr2	17140142	17140557	MACS_peak_1664	141.26
Chr2	17224480	17224798	MACS_peak_1665	71
Chr2	17233825	17235023	MACS_peak_1666	542.62
Chr2	17262094	17262620	MACS_peak_1667	54.07
Chr2	17322391	17322731	MACS_peak_1668	50.64
Chr2	17333743	17334142	MACS_peak_1669	313.31
Chr2	17367914	17368808	MACS_peak_1670	669.04
Chr2	17383696	17384434	MACS_peak_1671	78.97
Chr2	17399173	17399576	MACS_peak_1672	89.28
Chr2	17406753	17407200	MACS_peak_1673	117.75
Chr2	17436674	17437753	MACS_peak_1674	267
Chr2	17449301	17449783	MACS_peak_1675	59.34
Chr2	17471897	17472464	MACS_peak_1676	119.01
Chr2	17492842	17493289	MACS_peak_1677	61.15
Chr2	17514550	17514901	MACS_peak_1678	81.63
Chr2	17531391	17532888	MACS_peak_1679	865.63
Chr2	17537480	17537746	MACS_peak_1680	51.53
Chr2	17572472	17573258	MACS_peak_1681	198.78
Chr2	17602921	17603297	MACS_peak_1682	131.67
Chr2	17618376	17619121	MACS_peak_1683	114.9
Chr2	17621745	17622006	MACS_peak_1684	64.14
Chr2	17640927	17641622	MACS_peak_1685	217.7
Chr2	17642706	17643340	MACS_peak_1686	429.29
Chr2	17654710	17655370	MACS_peak_1687	119.29
Chr2	17667815	17668074	MACS_peak_1688	68.18
Chr2	17715392	17716332	MACS_peak_1689	100.25
Chr2	17729151	17729553	MACS_peak_1690	242.03
Chr2	17729871	17730877	MACS_peak_1691_MACS_peak_1692	176.337
Chr2	17748074	17748506	MACS_peak_1693	116.2
Chr2	17756085	17757476	MACS_peak_1694	109.18
Chr2	17757742	17758268	MACS_peak_1695	75.31
Chr2	17776792	17777679	MACS_peak_1696	142.27
Chr2	17799605	17800090	MACS_peak_1697	73.37
Chr2	17802978	17804936	MACS_peak_1698_MACS_peak_1699	110.872
Chr2	17805607	17806391	MACS_peak_1700	79.7
Chr2	17833436	17834327	MACS_peak_1701	115.33
Chr2	17836876	17837229	MACS_peak_1702	57.36
Chr2	17862492	17863233	MACS_peak_1703	97.25
Chr2	17866756	17867376	MACS_peak_1704	1656.17
Chr2	17893631	17894507	MACS_peak_1705	54.46
Chr2	17902689	17904229	MACS_peak_1706	169.07
Chr2	17909140	17909608	MACS_peak_1707	106.36
Chr2	17911249	17911611	MACS_peak_1708	57.06
Chr2	17920653	17921557	MACS_peak_1709	157.07
Chr2	17935233	17935696	MACS_peak_1710	128.56
Chr2	17945795	17946522	MACS_peak_1711	142.69
Chr2	17951457	17953542	MACS_peak_1712	228.62
Chr2	17965125	17965869	MACS_peak_1713	61.98
Chr2	17970012	17970859	MACS_peak_1714	58.86
Chr2	17984109	17985147	MACS_peak_1715	88.74
Chr2	18026974	18027452	MACS_peak_1718	81.82
Chr2	18034799	18035101	MACS_peak_1719	57.5
Chr2	18072598	18072844	MACS_peak_1720	74.13
Chr2	18109831	18110390	MACS_peak_1721	90.75
Chr2	18113549	18113876	MACS_peak_1722	63.39
Chr2	18115047	18115321	MACS_peak_1723	62.95
Chr2	18115840	18116058	MACS_peak_1724	53.21
Chr2	18116434	18116971	MACS_peak_1725	148.49
Chr2	18145737	18147146	MACS_peak_1726_MACS_peak_1727	160.74
Chr2	18147815	18148344	MACS_peak_1728	55.35
Chr2	18161546	18161895	MACS_peak_1729	56.29
Chr2	18202367	18202605	MACS_peak_1730	94.27
Chr2	18207592	18207963	MACS_peak_1731	134.09
Chr2	18220537	18221012	MACS_peak_1732	83.85
Chr2	18227348	18227818	MACS_peak_1733	63.74
Chr2	18253776	18254706	MACS_peak_1734	247.15
Chr2	18272342	18273173	MACS_peak_1735	226.35
Chr2	18297112	18297600	MACS_peak_1736	55.02
Chr2	18305337	18305746	MACS_peak_1737	144.81
Chr2	18309297	18309726	MACS_peak_1738	60.32
Chr2	18322163	18322818	MACS_peak_1739	130.08
Chr2	18323570	18323852	MACS_peak_1740	68.07
Chr2	18328969	18329522	MACS_peak_1741	53.94
Chr2	18333628	18334755	MACS_peak_1742	451.32
Chr2	18379631	18379949	MACS_peak_1743	64.75
Chr2	18383665	18384037	MACS_peak_1744	451.68
Chr2	18416296	18417214	MACS_peak_1745	97.78
Chr2	18422313	18422974	MACS_peak_1746	149.2
Chr2	18431066	18431688	MACS_peak_1747	56.37
Chr2	18434824	18435454	MACS_peak_1748	64.21
Chr2	18437525	18439138	MACS_peak_1749_MACS_peak_1750	253.004
Chr2	18462115	18462654	MACS_peak_1751	59.7
Chr2	18478843	18480062	MACS_peak_1752	138.73
Chr2	18495375	18496234	MACS_peak_1753	348.75
Chr2	18537458	18538159	MACS_peak_1754	84.18
Chr2	18563922	18565624	MACS_peak_1755_MACS_peak_1756	678.846
Chr2	18571672	18572046	MACS_peak_1757	81.25
Chr2	18575467	18575811	MACS_peak_1758	98.91
Chr2	18577802	18578429	MACS_peak_1759	80.35
Chr2	18582884	18584054	MACS_peak_1760	97.57
Chr2	18613948	18614816	MACS_peak_1761	467.21
Chr2	18618138	18620096	MACS_peak_1762	2225.58
Chr2	18641948	18642439	MACS_peak_1763	189.28
Chr2	18644534	18645057	MACS_peak_1764	168.32
Chr2	18645559	18646419	MACS_peak_1765	95.61
Chr2	18672561	18673316	MACS_peak_1767	134.82
Chr2	18673794	18675637	MACS_peak_1768	143.05
Chr2	18677106	18678328	MACS_peak_1769_MACS_peak_1770	85.1798
Chr2	18682578	18684013	MACS_peak_1771	309.39
Chr2	18685801	18686265	MACS_peak_1772	50.35
Chr2	18693446	18696786	MACS_peak_1773_MACS_peak_1774	1016.06
Chr2	18698699	18699408	MACS_peak_1775	108.31
Chr2	18718551	18718975	MACS_peak_1776	125.25
Chr2	18727757	18729099	MACS_peak_1777	67.24
Chr2	18742594	18744386	MACS_peak_1778	397.37
Chr2	18756491	18757344	MACS_peak_1779	71.05
Chr2	18770667	18772373	MACS_peak_1780	201.69
Chr2	18786113	18790823	MACS_peak_1781_MACS_peak_1782	571.692
Chr2	18791357	18795580	MACS_peak_1783	2109.75
Chr2	18795918	18796605	MACS_peak_1784	103.93
Chr2	18818106	18818426	MACS_peak_1785	299.73
Chr2	18820401	18821953	MACS_peak_1786	380.19
Chr2	18855865	18856177	MACS_peak_1787	83.27
Chr2	18866603	18867215	MACS_peak_1788	92.74
Chr2	18872946	18873506	MACS_peak_1789	97.69
Chr2	18875696	18876717	MACS_peak_1790	122.12
Chr2	18878931	18879832	MACS_peak_1791	73.47
Chr2	18882213	18882974	MACS_peak_1792	140.59
Chr2	18897481	18898042	MACS_peak_1793	537.44
Chr2	18899154	18899558	MACS_peak_1794	56.31
Chr2	18901621	18902524	MACS_peak_1795	95.88
Chr2	18903002	18903539	MACS_peak_1796	98.68
Chr2	18910359	18911516	MACS_peak_1797	73.88
Chr2	18912332	18914215	MACS_peak_1798	191.63
Chr2	18923744	18925646	MACS_peak_1799	74.06
Chr2	18929323	18931832	MACS_peak_1800	177.35
Chr2	18953305	18953981	MACS_peak_1801	64.2
Chr2	18961502	18961898	MACS_peak_1802	51.31
Chr2	18975858	18976084	MACS_peak_1803	55.04
Chr2	18977803	18978813	MACS_peak_1804_MACS_peak_1805	115.407
Chr2	18987428	18988204	MACS_peak_1806	72.9
Chr2	18988589	18989608	MACS_peak_1807	120.92
Chr2	18991485	18991933	MACS_peak_1808	88.61
Chr2	18997577	18998300	MACS_peak_1809	68.26
Chr2	19018902	19019229	MACS_peak_1810	59.73
Chr2	19072807	19073123	MACS_peak_1811	70.4
Chr2	19079204	19079883	MACS_peak_1812	113.33
Chr2	19096746	19097444	MACS_peak_1813	280.56
Chr2	19098829	19099618	MACS_peak_1814_MACS_peak_1815	72.2262
Chr2	19116684	19117213	MACS_peak_1816	77.47
Chr2	19125046	19125845	MACS_peak_1817	1556.13
Chr2	19135684	19136546	MACS_peak_1818	269.54
Chr2	19136891	19137471	MACS_peak_1819	108.07
Chr2	19138566	19140481	MACS_peak_1820_MACS_peak_1821_MACS_peak_1822	217.755
Chr2	19153551	19153827	MACS_peak_1823	58.43
Chr2	19154441	19155447	MACS_peak_1824	113.55
Chr2	19192003	19192542	MACS_peak_1825	74.1
Chr2	19204365	19204981	MACS_peak_1826	64.43
Chr2	19277208	19277726	MACS_peak_1827	65.51
Chr2	19292257	19292602	MACS_peak_1828	61.63
Chr2	19318570	19318860	MACS_peak_1829	87.64
Chr2	19349854	19350235	MACS_peak_1830	55.35
Chr2	19352728	19352983	MACS_peak_1831	50.52
Chr2	19370158	19370482	MACS_peak_1832	53.8
Chr2	19385890	19386181	MACS_peak_1833	94.98
Chr2	19401437	19401952	MACS_peak_1834	120.94
Chr2	19423601	19424135	MACS_peak_1835	73.1
Chr2	19431151	19431732	MACS_peak_1836	102.19
Chr2	19470485	19471568	MACS_peak_1837_MACS_peak_1838	280.169
Chr2	19472942	19473622	MACS_peak_1839_MACS_peak_1840	94.4105
Chr2	19512260	19512590	MACS_peak_1841	76.76
Chr2	19530472	19531311	MACS_peak_1842_MACS_peak_1843	198.459
Chr2	19540936	19541383	MACS_peak_1844	351.02
Chr2	19544147	19544511	MACS_peak_1845	92.64
Chr2	19575366	19576335	MACS_peak_1846_MACS_peak_1847	190.967
Chr2	19594491	19595617	MACS_peak_1848_MACS_peak_1849_MACS_peak_1850	547.647
Chr2	19595990	19596487	MACS_peak_1851_MACS_peak_1852	66.2883
Chr2	19600384	19601577	MACS_peak_1853_MACS_peak_1854_MACS_peak_1855	102.596
Chr2	19608084	19608301	MACS_peak_1856	50.98
Chr2	19637960	19638480	MACS_peak_1857	198.56
Chr2	19641384	19643152	MACS_peak_1858	979.16
Chr2	19666928	19667188	MACS_peak_1860	103.2
Chr2	19677938	19678170	MACS_peak_1861	62.17
Chr2	19679011	19679416	MACS_peak_1862	76.49
Chr3	138938	139523	MACS_peak_1865	177
Chr3	165630	166245	MACS_peak_1866_MACS_peak_1867	83.2396
Chr3	173500	173748	MACS_peak_1868	56.18
Chr3	222249	222673	MACS_peak_1870	122.97
Chr3	229003	229231	MACS_peak_1871	64.06
Chr3	245612	246249	MACS_peak_1872	1006.68
Chr3	258191	258438	MACS_peak_1873	73.92
Chr3	270979	271225	MACS_peak_1874	73.06
Chr3	279071	280086	MACS_peak_1875_MACS_peak_1876	235.944
Chr3	310288	310845	MACS_peak_1877	589.48
Chr3	311204	311656	MACS_peak_1878	121.38
Chr3	312324	313917	MACS_peak_1879_MACS_peak_1880_MACS_peak_1881	245.61
Chr3	319523	320842	MACS_peak_1882	726.05
Chr3	327941	328673	MACS_peak_1883_MACS_peak_1884	112.795
Chr3	338140	338385	MACS_peak_1885	61.15
Chr3	344505	345282	MACS_peak_1886	1389.25
Chr3	347213	348003	MACS_peak_1888	391.08
Chr3	351320	351527	MACS_peak_1889	54.65
Chr3	359071	359306	MACS_peak_1890	67.46
Chr3	359715	360751	MACS_peak_1891	521.45
Chr3	385701	386182	MACS_peak_1892	250.24
Chr3	397626	397886	MACS_peak_1893	83.93
Chr3	474132	474384	MACS_peak_1895	56.26
Chr3	479284	480122	MACS_peak_1896	1040.89
Chr3	483347	483642	MACS_peak_1898	94.88
Chr3	488328	488581	MACS_peak_1899	53.07
Chr3	489852	490919	MACS_peak_1900_MACS_peak_1901_MACS_peak_1902	391.95
Chr3	492312	492530	MACS_peak_1903	67.37
Chr3	498287	498696	MACS_peak_1904	130.19
Chr3	499515	499821	MACS_peak_1905	108.65
Chr3	510245	511244	MACS_peak_1906	277.78
Chr3	513709	513929	MACS_peak_1907	62.54
Chr3	561058	561338	MACS_peak_1908	145.01
Chr3	561674	562183	MACS_peak_1909_MACS_peak_1910	62.1893
Chr3	582605	584000	MACS_peak_1911_MACS_peak_1912	417.099
Chr3	632615	633121	MACS_peak_1914	265.07
Chr3	635276	637001	MACS_peak_1915_MACS_peak_1916_MACS_peak_1917_MACS_peak_1918	133.312
Chr3	723704	724171	MACS_peak_1919	194.88
Chr3	729720	730036	MACS_peak_1920	98.66
Chr3	815844	816056	MACS_peak_1921	52.42
Chr3	819292	821252	MACS_peak_1922	2933.49
Chr3	824260	824570	MACS_peak_1923	79.12
Chr3	844410	844745	MACS_peak_1924	175.77
Chr3	910078	910399	MACS_peak_1925	71.03
Chr3	946049	946754	MACS_peak_1926_MACS_peak_1927	132.984
Chr3	990258	990523	MACS_peak_1929	57.47
Chr3	1034075	1034292	MACS_peak_1930	56.36
Chr3	1051024	1051332	MACS_peak_1931	96.85
Chr3	1070781	1071041	MACS_peak_1932	140.8
Chr3	1077718	1078003	MACS_peak_1933	115.39
Chr3	1087371	1087669	MACS_peak_1934	112.57
Chr3	1110864	1111212	MACS_peak_1935	122.43
Chr3	1241220	1241600	MACS_peak_1937	469.57
Chr3	1256641	1257081	MACS_peak_1938_MACS_peak_1939	108.559
Chr3	1261290	1261508	MACS_peak_1940	56.06
Chr3	1313388	1315040	MACS_peak_1941_MACS_peak_1942	593.501
Chr3	1328896	1329126	MACS_peak_1943	59.15
Chr3	1340212	1340423	MACS_peak_1944	75.87
Chr3	1346637	1347474	MACS_peak_1945_MACS_peak_1946	267.234
Chr3	1347824	1348265	MACS_peak_1947	285.02
Chr3	1349157	1349587	MACS_peak_1948	97.98
Chr3	1362822	1364070	MACS_peak_1949_MACS_peak_1950_MACS_peak_1951	140.056
Chr3	1477463	1478553	MACS_peak_1953	197.69
Chr3	1523290	1523736	MACS_peak_1954	176.64
Chr3	1554844	1555103	MACS_peak_1955	71.33
Chr3	1557484	1558116	MACS_peak_1956	53.81
Chr3	1594399	1594726	MACS_peak_1957	56.23
Chr3	1627036	1627589	MACS_peak_1958	161.11
Chr3	1727671	1728026	MACS_peak_1959	87.04
Chr3	1798263	1799278	MACS_peak_1960_MACS_peak_1961_MACS_peak_1962	228.397
Chr3	1880605	1881136	MACS_peak_1963_MACS_peak_1964	56.1577
Chr3	1887220	1887594	MACS_peak_1965	440.34
Chr3	1908992	1909270	MACS_peak_1966	99.78
Chr3	1981018	1981625	MACS_peak_1967	437.42
Chr3	1984168	1984443	MACS_peak_1968	60.02
Chr3	2037499	2037786	MACS_peak_1970	96.43
Chr3	2047895	2048644	MACS_peak_1971	803.14
Chr3	2054904	2055276	MACS_peak_1972	95.5
Chr3	2059794	2060211	MACS_peak_1973	438.99
Chr3	2103554	2103902	MACS_peak_1974	358.07
Chr3	2143432	2143873	MACS_peak_1975	371.07
Chr3	2154808	2156026	MACS_peak_1976_MACS_peak_1977	388.874
Chr3	2206963	2207502	MACS_peak_1979_MACS_peak_1980	86.6443
Chr3	2239350	2239614	MACS_peak_1981	98.97
Chr3	2254906	2255221	MACS_peak_1982	73.63
Chr3	2264165	2264818	MACS_peak_1983	504.5
Chr3	2284825	2285077	MACS_peak_1984	67.65
Chr3	2332770	2333557	MACS_peak_1986_MACS_peak_1987	559.05
Chr3	2338456	2338793	MACS_peak_1988	125.65
Chr3	2347764	2348505	MACS_peak_1989	184.79
Chr3	2354908	2355201	MACS_peak_1990	293.22
Chr3	2365538	2365830	MACS_peak_1991	65.86
Chr3	2379373	2379607	MACS_peak_1993	68.26
Chr3	2388980	2389309	MACS_peak_1994	80.17
Chr3	2406290	2407065	MACS_peak_1995_MACS_peak_1996	124.403
Chr3	2410162	2410593	MACS_peak_1997	55.89
Chr3	2518383	2518776	MACS_peak_1999	363.29
Chr3	2537465	2537694	MACS_peak_2000	87.61
Chr3	2620880	2621129	MACS_peak_2005	86.16
Chr3	2621565	2621850	MACS_peak_2006	73.93
Chr3	2623293	2623624	MACS_peak_2007	87.32
Chr3	2624951	2626175	MACS_peak_2008_MACS_peak_2009	192.117
Chr3	2626462	2626731	MACS_peak_2010	84.96
Chr3	2658369	2658570	MACS_peak_2012	56.17
Chr3	2675917	2676434	MACS_peak_2014_MACS_peak_2015	63.242
Chr3	2677727	2678002	MACS_peak_2016	93.67
Chr3	2685337	2686478	MACS_peak_2017_MACS_peak_2018	200.364
Chr3	2746964	2747731	MACS_peak_2020	206.82
Chr3	2754859	2756114	MACS_peak_2021_MACS_peak_2022	433.073
Chr3	2769721	2770523	MACS_peak_2023_MACS_peak_2024	86.5394
Chr3	2893015	2893428	MACS_peak_2025	106.96
Chr3	2903727	2904171	MACS_peak_2026	104.7
Chr3	2924090	2925454	MACS_peak_2027_MACS_peak_2028_MACS_peak_2029	104.613
Chr3	2926676	2926933	MACS_peak_2030	58.58
Chr3	2940307	2941141	MACS_peak_2032	981.06
Chr3	2942633	2944010	MACS_peak_2033	2322.9
Chr3	2945127	2945329	MACS_peak_2034	53.21
Chr3	2953718	2954641	MACS_peak_2035_MACS_peak_2036	116.681
Chr3	2958846	2959496	MACS_peak_2037	104.76
Chr3	2966605	2966857	MACS_peak_2038	54.38
Chr3	2968252	2968542	MACS_peak_2039	66.67
Chr3	2971542	2971858	MACS_peak_2040	94.46
Chr3	2974233	2974600	MACS_peak_2041	68.9
Chr3	2976936	2977412	MACS_peak_2042	127.39
Chr3	2983995	2984304	MACS_peak_2043	264.9
Chr3	2991891	2992567	MACS_peak_2044	532.4
Chr3	2996775	2997741	MACS_peak_2045_MACS_peak_2046	60.2035
Chr3	3000908	3002120	MACS_peak_2047	187.52
Chr3	3002477	3003059	MACS_peak_2048	161.81
Chr3	3021867	3022384	MACS_peak_2049	118.53
Chr3	3023823	3024560	MACS_peak_2050	729.33
Chr3	3085377	3085649	MACS_peak_2051	77.59
Chr3	3085958	3086161	MACS_peak_2052	51.01
Chr3	3094149	3094908	MACS_peak_2053	121.84
Chr3	3105344	3106865	MACS_peak_2054_MACS_peak_2055	284.733
Chr3	3107594	3108475	MACS_peak_2056	342.04
Chr3	3155452	3155887	MACS_peak_2057	67.46
Chr3	3186406	3187016	MACS_peak_2058	152.35
Chr3	3206574	3207482	MACS_peak_2059	582.85
Chr3	3214162	3215089	MACS_peak_2060	1621.32
Chr3	3230691	3231127	MACS_peak_2061	121.24
Chr3	3232606	3233249	MACS_peak_2062	156.18
Chr3	3237723	3238129	MACS_peak_2063	120.32
Chr3	3239299	3239792	MACS_peak_2064	157.9
Chr3	3325576	3326078	MACS_peak_2065	88.81
Chr3	3326689	3327206	MACS_peak_2066	65.73
Chr3	3330624	3330905	MACS_peak_2067	54.59
Chr3	3337037	3337401	MACS_peak_2068	102.46
Chr3	3338114	3338650	MACS_peak_2069	135.09
Chr3	3356974	3357446	MACS_peak_2070	108.72
Chr3	3359621	3360544	MACS_peak_2071	510.84
Chr3	3372910	3373964	MACS_peak_2072	876.68
Chr3	3382074	3382465	MACS_peak_2073	64.77
Chr3	3425336	3426202	MACS_peak_2074	437.48
Chr3	3442899	3443134	MACS_peak_2075	85.29
Chr3	3458886	3459095	MACS_peak_2076	68.33
Chr3	3468025	3468273	MACS_peak_2077	63.37
Chr3	3494068	3494379	MACS_peak_2079	64.97
Chr3	3561709	3562152	MACS_peak_2080	155.62
Chr3	3584662	3585901	MACS_peak_2081	1082.3
Chr3	3608355	3608562	MACS_peak_2082	51.65
Chr3	3626522	3626779	MACS_peak_2083	79.01
Chr3	3660775	3661882	MACS_peak_2084	627.32
Chr3	3674417	3674729	MACS_peak_2085	59.45
Chr3	3684072	3684331	MACS_peak_2086	73.39
Chr3	3695234	3696100	MACS_peak_2087_MACS_peak_2088	132.374
Chr3	3726172	3726443	MACS_peak_2089	93.67
Chr3	3861326	3861606	MACS_peak_2090	74.7
Chr3	3919135	3919501	MACS_peak_2092	80.3
Chr3	3944940	3945287	MACS_peak_2094	106.9
Chr3	3948332	3948685	MACS_peak_2095	80.19
Chr3	3949630	3950245	MACS_peak_2096_MACS_peak_2097	139.647
Chr3	3951282	3952164	MACS_peak_2098	609.54
Chr3	3955091	3955327	MACS_peak_2099	54.93
Chr3	4007054	4007568	MACS_peak_2100	121.9
Chr3	4029952	4030200	MACS_peak_2101	63.37
Chr3	4030861	4032169	MACS_peak_2102	1126.58
Chr3	4297148	4297918	MACS_peak_2104	288.37
Chr3	4346825	4348161	MACS_peak_2105_MACS_peak_2106	282.738
Chr3	4349116	4349923	MACS_peak_2107	181.91
Chr3	4351910	4352916	MACS_peak_2108_MACS_peak_2109	117.923
Chr3	4356233	4356776	MACS_peak_2110	108.35
Chr3	4405363	4405602	MACS_peak_2111	283.69
Chr3	4463040	4463505	MACS_peak_2112	116.29
Chr3	4591180	4591479	MACS_peak_2114	110.31
Chr3	4613001	4613261	MACS_peak_2115	106.95
Chr3	4658526	4662392	MACS_peak_2116_MACS_peak_2117_MACS_peak_2118_MACS_peak_2119	531.305
Chr3	4662932	4663180	MACS_peak_2120	57.99
Chr3	4742109	4743711	MACS_peak_2121_MACS_peak_2122	701.309
Chr3	4767668	4769007	MACS_peak_2123_MACS_peak_2124	937.692
Chr3	4832574	4833664	MACS_peak_2125	469.13
Chr3	4950981	4951383	MACS_peak_2126	87.16
Chr3	4967938	4968884	MACS_peak_2127_MACS_peak_2128	76.6231
Chr3	4970170	4970421	MACS_peak_2129	68.76
Chr3	5013850	5015401	MACS_peak_2130	655.42
Chr3	5027760	5028718	MACS_peak_2132_MACS_peak_2133	141.382
Chr3	5050216	5050743	MACS_peak_2134	99.49
Chr3	5051688	5052238	MACS_peak_2135	96.45
Chr3	5052715	5054110	MACS_peak_2136	213.06
Chr3	5062375	5063686	MACS_peak_2137	359.81
Chr3	5069019	5069356	MACS_peak_2138	57.57
Chr3	5085443	5085722	MACS_peak_2139	85.2
Chr3	5092075	5092370	MACS_peak_2140	51.29
Chr3	5093719	5094152	MACS_peak_2141	75.81
Chr3	5121644	5122160	MACS_peak_2142	121.57
Chr3	5144212	5144456	MACS_peak_2143	55.62
Chr3	5176936	5177163	MACS_peak_2144	70.17
Chr3	5186187	5186537	MACS_peak_2146	140.49
Chr3	5202536	5202834	MACS_peak_2147	67.44
Chr3	5219384	5219664	MACS_peak_2148	100.45
Chr3	5248846	5249499	MACS_peak_2149_MACS_peak_2150	79.8844
Chr3	5253195	5253468	MACS_peak_2151	61.08
Chr3	5296228	5296806	MACS_peak_2152	314.08
Chr3	5297210	5297454	MACS_peak_2153	83.89
Chr3	5444511	5445426	MACS_peak_2154	445.36
Chr3	5463172	5463537	MACS_peak_2155	128.36
Chr3	5472081	5473070	MACS_peak_2156_MACS_peak_2157	85.6183
Chr3	5474731	5475268	MACS_peak_2158	509.92
Chr3	5593262	5593623	MACS_peak_2159	142.16
Chr3	5617715	5618080	MACS_peak_2160	59.98
Chr3	5644677	5645122	MACS_peak_2161	98.45
Chr3	5692897	5693686	MACS_peak_2162	167.3
Chr3	5699813	5700932	MACS_peak_2163	79.83
Chr3	5702946	5704548	MACS_peak_2164	162.45
Chr3	5706141	5706826	MACS_peak_2165	101.76
Chr3	5710938	5711623	MACS_peak_2166	69.87
Chr3	5749215	5749706	MACS_peak_2167	66.69
Chr3	5756593	5761159	MACS_peak_2168_MACS_peak_2169	169.562
Chr3	5761485	5762199	MACS_peak_2170	124.78
Chr3	5773125	5775712	MACS_peak_2171_MACS_peak_2172	91.628
Chr3	5783934	5785942	MACS_peak_2173	1115.88
Chr3	5795739	5797558	MACS_peak_2174	54.91
Chr3	5807550	5808719	MACS_peak_2175	60.06
Chr3	5809426	5813037	MACS_peak_2176	74.09
Chr3	5826663	5827419	MACS_peak_2177	52.41
Chr3	5831328	5832267	MACS_peak_2178	65.39
Chr3	5837753	5838421	MACS_peak_2179	77.74
Chr3	5844447	5845104	MACS_peak_2180	96.18
Chr3	5892803	5893230	MACS_peak_2181	112.77
Chr3	5936212	5936634	MACS_peak_2182	92.61
Chr3	5977123	5977624	MACS_peak_2183	100.36
Chr3	5980744	5981198	MACS_peak_2184	114.63
Chr3	6085937	6086171	MACS_peak_2185	79.5
Chr3	6091291	6091585	MACS_peak_2186	50.65
Chr3	6094182	6094517	MACS_peak_2187	94.34
Chr3	6098177	6099411	MACS_peak_2188	854.31
Chr3	6101780	6102198	MACS_peak_2189	86.31
Chr3	6106150	6106432	MACS_peak_2190	80.29
Chr3	6107954	6108391	MACS_peak_2191	53.95
Chr3	6128901	6129160	MACS_peak_2192	61.96
Chr3	6170436	6171035	MACS_peak_2193	130.49
Chr3	6181023	6181304	MACS_peak_2194	59.78
Chr3	6228983	6229452	MACS_peak_2195	162
Chr3	6231245	6231722	MACS_peak_2196	101.51
Chr3	6232053	6232597	MACS_peak_2197	199.01
Chr3	6251651	6252599	MACS_peak_2198	241.95
Chr3	6278501	6278917	MACS_peak_2199	99.94
Chr3	6283624	6284058	MACS_peak_2200	52.76
Chr3	6309418	6310322	MACS_peak_2201	438.96
Chr3	6313470	6314015	MACS_peak_2202	65.3
Chr3	6324952	6325725	MACS_peak_2203_MACS_peak_2204	68.4893
Chr3	6341887	6342986	MACS_peak_2205	1580.37
Chr3	6349245	6350329	MACS_peak_2206_MACS_peak_2207	175.432
Chr3	6430066	6430420	MACS_peak_2208	64.19
Chr3	6479959	6480275	MACS_peak_2209	98.41
Chr3	6480738	6481225	MACS_peak_2210	154.34
Chr3	6489636	6490221	MACS_peak_2211	106.58
Chr3	6524094	6525249	MACS_peak_2212	1266.34
Chr3	6537359	6538203	MACS_peak_2213_MACS_peak_2214	598.136
Chr3	6546729	6547642	MACS_peak_2215	56.02
Chr3	6560587	6560883	MACS_peak_2216	58.09
Chr3	6598626	6598884	MACS_peak_2217	65.97
Chr3	6609796	6611078	MACS_peak_2218	485.4
Chr3	6631655	6631898	MACS_peak_2219	60.98
Chr3	6714810	6715388	MACS_peak_2220_MACS_peak_2221	66.0923
Chr3	6740837	6741086	MACS_peak_2222	68.42
Chr3	6750299	6750787	MACS_peak_2223	258.32
Chr3	6752610	6753571	MACS_peak_2224_MACS_peak_2225	119.688
Chr3	6754885	6755244	MACS_peak_2226	71
Chr3	6763734	6764025	MACS_peak_2227	110.63
Chr3	6772462	6773161	MACS_peak_2228	304.38
Chr3	6797668	6798798	MACS_peak_2229	566.23
Chr3	6817730	6818386	MACS_peak_2230	250.18
Chr3	6840450	6842081	MACS_peak_2231_MACS_peak_2232	2662.49
Chr3	6926423	6926821	MACS_peak_2233	119.32
Chr3	6930213	6930891	MACS_peak_2234	129.2
Chr3	6942699	6944866	MACS_peak_2235	843.91
Chr3	6959941	6960174	MACS_peak_2236	59.59
Chr3	6963937	6964180	MACS_peak_2237	55.92
Chr3	6971441	6972098	MACS_peak_2238	548.55
Chr3	6978792	6979929	MACS_peak_2239	279.85
Chr3	7006481	7006745	MACS_peak_2240	57.84
Chr3	7016586	7017410	MACS_peak_2241	980.61
Chr3	7045212	7045708	MACS_peak_2242	266.31
Chr3	7060808	7061196	MACS_peak_2243	99.59
Chr3	7156070	7156298	MACS_peak_2244	66.23
Chr3	7173679	7173908	MACS_peak_2245	54.5
Chr3	7270973	7271510	MACS_peak_2246	204.35
Chr3	7275766	7276183	MACS_peak_2247	71.16
Chr3	7281170	7281454	MACS_peak_2248	69.47
Chr3	7285286	7285529	MACS_peak_2249	51.56
Chr3	7345661	7346086	MACS_peak_2250	566.99
Chr3	7399193	7399473	MACS_peak_2251	118.02
Chr3	7460541	7460859	MACS_peak_2252	109.24
Chr3	7474939	7475267	MACS_peak_2253	177.55
Chr3	7667341	7667580	MACS_peak_2255	51.84
Chr3	7668070	7668412	MACS_peak_2256	123.41
Chr3	7675242	7675492	MACS_peak_2257	57.43
Chr3	7803904	7804917	MACS_peak_2258_MACS_peak_2259	120.627
Chr3	7806726	7807652	MACS_peak_2260_MACS_peak_2261	183.665
Chr3	7829608	7830251	MACS_peak_2262	612.97
Chr3	7867847	7868334	MACS_peak_2263	147.28
Chr3	7877088	7877494	MACS_peak_2264	69.29
Chr3	7885668	7885999	MACS_peak_2265	52.16
Chr3	7886722	7886939	MACS_peak_2266	60.87
Chr3	7894694	7895134	MACS_peak_2267	68.15
Chr3	7913318	7913672	MACS_peak_2268	87.56
Chr3	7914795	7918646	MACS_peak_2269_MACS_peak_2270	1568.99
Chr3	7933344	7933827	MACS_peak_2271	89.18
Chr3	7953133	7954256	MACS_peak_2272	1082.72
Chr3	7992206	7992650	MACS_peak_2273	218.66
Chr3	8010456	8010777	MACS_peak_2274	53.29
Chr3	8069982	8070367	MACS_peak_2275	59.73
Chr3	8079020	8079257	MACS_peak_2276	84.53
Chr3	8139453	8139922	MACS_peak_2277	82.63
Chr3	8153554	8153856	MACS_peak_2278	79.77
Chr3	8161218	8162359	MACS_peak_2279	564.98
Chr3	8172672	8172980	MACS_peak_2280	58.19
Chr3	8177908	8178132	MACS_peak_2281	56.96
Chr3	8220892	8221097	MACS_peak_2283	58.59
Chr3	8404366	8404858	MACS_peak_2284	66.67
Chr3	8472259	8473287	MACS_peak_2285	140.07
Chr3	8517437	8517689	MACS_peak_2286	70.61
Chr3	8589069	8589402	MACS_peak_2287	86.66
Chr3	8603384	8604018	MACS_peak_2288	694.06
Chr3	8611923	8612143	MACS_peak_2289	78.64
Chr3	8642891	8643593	MACS_peak_2290	316.54
Chr3	8708013	8708243	MACS_peak_2291	69.12
Chr3	8724531	8724805	MACS_peak_2292	86.12
Chr3	8761732	8762201	MACS_peak_2293	87.48
Chr3	8805851	8807038	MACS_peak_2294	1637.31
Chr3	8917314	8918385	MACS_peak_2296	879
Chr3	8941781	8942367	MACS_peak_2297	584.27
Chr3	9028821	9029283	MACS_peak_2298	197.42
Chr3	9064555	9064758	MACS_peak_2299	60.81
Chr3	9122867	9123221	MACS_peak_2300	52.83
Chr3	9155090	9155607	MACS_peak_2301	794.09
Chr3	9192817	9193119	MACS_peak_2302	50.48
Chr3	9209251	9209637	MACS_peak_2303	106.83
Chr3	9318492	9319101	MACS_peak_2305	182.69
Chr3	9359035	9360232	MACS_peak_2306_MACS_peak_2307	1525.54
Chr3	9460650	9461117	MACS_peak_2308	58.57
Chr3	9538397	9538626	MACS_peak_2309	69.67
Chr3	9561852	9562119	MACS_peak_2310	117.03
Chr3	9605802	9606174	MACS_peak_2311_MACS_peak_2312	53.3863
Chr3	9606478	9607020	MACS_peak_2313_MACS_peak_2314_MACS_peak_2315	174.538
Chr3	9674708	9674986	MACS_peak_2316	71.68
Chr3	9722818	9723134	MACS_peak_2317	85.38
Chr3	9750545	9750899	MACS_peak_2319	59.98
Chr3	9757648	9758184	MACS_peak_2320	158.02
Chr3	9759323	9760035	MACS_peak_2321_MACS_peak_2322	134.621
Chr3	9793924	9794203	MACS_peak_2323	252.91
Chr3	9845963	9846192	MACS_peak_2325	69.45
Chr3	9915774	9916043	MACS_peak_2326	53.38
Chr3	9950220	9950671	MACS_peak_2327	182.18
Chr3	9981944	9982146	MACS_peak_2329	54.69
Chr3	10090344	10090796	MACS_peak_2331	616.43
Chr3	10119417	10119946	MACS_peak_2332	159.64
Chr3	10317613	10317830	MACS_peak_2334	60.65
Chr3	10318513	10318787	MACS_peak_2335	169.63
Chr3	10324856	10325098	MACS_peak_2336	128.56
Chr3	11052266	11052561	MACS_peak_2340	118.42
Chr3	11147252	11147537	MACS_peak_2341	64.8
Chr3	11280640	11281448	MACS_peak_2342_MACS_peak_2343	77.5823
Chr3	11297485	11297771	MACS_peak_2344	53.05
Chr3	11527863	11529299	MACS_peak_2345	347.24
Chr3	11531786	11532470	MACS_peak_2346	162.4
Chr3	11559900	11560374	MACS_peak_2347	52.54
Chr3	12044101	12044334	MACS_peak_2348	65.79
Chr3	12045504	12045766	MACS_peak_2349	50.03
Chr3	12185508	12185769	MACS_peak_2350	100.16
Chr3	12695016	12695242	MACS_peak_2351	75.15
Chr3	12795718	12796913	MACS_peak_2352	91.05
Chr3	12803944	12804854	MACS_peak_2353	83.24
Chr3	12820560	12821752	MACS_peak_2354	67.18
Chr3	12861834	12864014	MACS_peak_2357	135.08
Chr3	12923880	12924539	MACS_peak_2358	326.82
Chr3	12934778	12937720	MACS_peak_2359	134.95
Chr3	13099376	13099798	MACS_peak_2360	96.87
Chr3	13393682	13393984	MACS_peak_2361	134.84
Chr3	13394341	13394676	MACS_peak_2362	80.64
Chr3	13489288	13489860	MACS_peak_2363	603.73
Chr3	13588862	13589345	MACS_peak_2364	79.59
Chr3	13591848	13592194	MACS_peak_2365	129.83
Chr3	14085429	14086114	MACS_peak_2366	247.12
Chr3	14162413	14162875	MACS_peak_2367	93.41
Chr3	14167565	14168363	MACS_peak_2368	283.28
Chr3	14195583	14196103	MACS_peak_2370_MACS_peak_2371	735.996
Chr3	14196503	14196973	MACS_peak_2372_MACS_peak_2373	625.074
Chr3	14199554	14200134	MACS_peak_2376_MACS_peak_2377	536.124
Chr3	14201443	14201753	MACS_peak_2379	1109.47
Chr3	14202064	14202406	MACS_peak_2380_MACS_peak_2381	414.266
Chr3	14255340	14255788	MACS_peak_2384_MACS_peak_2385	153.868
Chr3	14302684	14303001	MACS_peak_2386	51.31
Chr3	14751626	14752075	MACS_peak_2388	71.97
Chr3	14799040	14799294	MACS_peak_2389	67.33
Chr3	15091837	15092090	MACS_peak_2390	53.14
Chr3	15179680	15180152	MACS_peak_2392_MACS_peak_2393	60.5202
Chr3	15194481	15194950	MACS_peak_2394	286.7
Chr3	15268466	15269063	MACS_peak_2396	113.24
Chr3	15559264	15559497	MACS_peak_2398	65.16
Chr3	15567185	15567802	MACS_peak_2399	90.96
Chr3	15597918	15600207	MACS_peak_2400_MACS_peak_2401	1409.92
Chr3	15813488	15813777	MACS_peak_2402	114.28
Chr3	16018973	16019698	MACS_peak_2404	109.31
Chr3	16036329	16036706	MACS_peak_2405	54.92
Chr3	16175481	16175768	MACS_peak_2406	91.74
Chr3	16191630	16191983	MACS_peak_2407	60.59
Chr3	16271773	16273041	MACS_peak_2408_MACS_peak_2409_MACS_peak_2410	173.349
Chr3	16398524	16398846	MACS_peak_2411	56.05
Chr3	16403444	16404136	MACS_peak_2412	329.81
Chr3	16497801	16498417	MACS_peak_2413	82.17
Chr3	16503362	16504272	MACS_peak_2414	454.14
Chr3	16569296	16569595	MACS_peak_2415	79.36
Chr3	16591131	16591757	MACS_peak_2416	133.78
Chr3	16689423	16689718	MACS_peak_2417	129.04
Chr3	16739614	16739821	MACS_peak_2418	58.01
Chr3	16750193	16750769	MACS_peak_2419	257.3
Chr3	16795043	16795336	MACS_peak_2420	354.36
Chr3	16818538	16818870	MACS_peak_2421	65.11
Chr3	16848201	16849444	MACS_peak_2422_MACS_peak_2423_MACS_peak_2424	118.073
Chr3	16893459	16893738	MACS_peak_2425	51.31
Chr3	16984269	16984837	MACS_peak_2426	81.82
Chr3	17006874	17007197	MACS_peak_2427	71.37
Chr3	17042300	17043268	MACS_peak_2428	225.2
Chr3	17124084	17126526	MACS_peak_2429_MACS_peak_2430_MACS_peak_2431	542.929
Chr3	17134352	17134977	MACS_peak_2432	290.3
Chr3	17136604	17137866	MACS_peak_2433_MACS_peak_2434	209.161
Chr3	17145819	17146761	MACS_peak_2435	77.8
Chr3	17181830	17184170	MACS_peak_2436_MACS_peak_2437	1166.32
Chr3	17218696	17219255	MACS_peak_2438	50.24
Chr3	17337191	17337480	MACS_peak_2439	54.61
Chr3	17465564	17466291	MACS_peak_2440	149.86
Chr3	17467161	17467689	MACS_peak_2441	118.31
Chr3	17493910	17494113	MACS_peak_2443	52.61
Chr3	17559149	17559400	MACS_peak_2445	61.83
Chr3	17585301	17585548	MACS_peak_2446	51.04
Chr3	17586245	17586553	MACS_peak_2447	82.65
Chr3	17636505	17637187	MACS_peak_2448	215.6
Chr3	17644458	17644931	MACS_peak_2449	110.89
Chr3	17645358	17645676	MACS_peak_2450	50.64
Chr3	17651791	17652655	MACS_peak_2451	173.02
Chr3	17652917	17653232	MACS_peak_2452	60.54
Chr3	17681159	17681672	MACS_peak_2453	86.47
Chr3	17771626	17773230	MACS_peak_2454	1544.71
Chr3	17949545	17949929	MACS_peak_2455	72
Chr3	17967716	17968452	MACS_peak_2456	198.74
Chr3	17975139	17976457	MACS_peak_2457_MACS_peak_2458_MACS_peak_2459	173.131
Chr3	18001771	18002624	MACS_peak_2460	628.24
Chr3	18003094	18003410	MACS_peak_2461	51.54
Chr3	18013374	18013671	MACS_peak_2462	79.73
Chr3	18031685	18033004	MACS_peak_2463_MACS_peak_2464_MACS_peak_2465	435.528
Chr3	18037698	18037995	MACS_peak_2466	81.38
Chr3	18039032	18039824	MACS_peak_2467	135.56
Chr3	18096466	18096676	MACS_peak_2468	53.62
Chr3	18117519	18117814	MACS_peak_2469	55.17
Chr3	18155842	18156441	MACS_peak_2470	157.16
Chr3	18192671	18193384	MACS_peak_2471_MACS_peak_2472	138.092
Chr3	18249862	18250530	MACS_peak_2473_MACS_peak_2474	64.0598
Chr3	18257590	18257947	MACS_peak_2475	68.42
Chr3	18303454	18303735	MACS_peak_2476	86.23
Chr3	18307416	18307818	MACS_peak_2477	114.78
Chr3	18352452	18352772	MACS_peak_2478	108.37
Chr3	18365995	18366268	MACS_peak_2479	58.54
Chr3	18372637	18373100	MACS_peak_2480	136.44
Chr3	18413667	18413960	MACS_peak_2481	72.28
Chr3	18445106	18445667	MACS_peak_2482	120.18
Chr3	18468418	18469026	MACS_peak_2483	162.2
Chr3	18501564	18502036	MACS_peak_2484	97.63
Chr3	18534431	18534694	MACS_peak_2485	67.99
Chr3	18558450	18558710	MACS_peak_2487	124.74
Chr3	18572691	18572969	MACS_peak_2488	74.24
Chr3	18648625	18649027	MACS_peak_2489	90.89
Chr3	18665394	18666575	MACS_peak_2490	600.51
Chr3	18677321	18677854	MACS_peak_2491	71.62
Chr3	18713127	18713566	MACS_peak_2492	54.57
Chr3	18753907	18754213	MACS_peak_2493	87.48
Chr3	18806678	18806920	MACS_peak_2494	71.68
Chr3	18807185	18807944	MACS_peak_2495	287.18
Chr3	18832767	18833034	MACS_peak_2496	65.16
Chr3	18836291	18836830	MACS_peak_2497_MACS_peak_2498	74.6042
Chr3	18855577	18855950	MACS_peak_2499	50.37
Chr3	18891087	18892365	MACS_peak_2500_MACS_peak_2501_MACS_peak_2502	69.635
Chr3	18896483	18896696	MACS_peak_2503	50.39
Chr3	18897047	18897367	MACS_peak_2504	60
Chr3	18901549	18901958	MACS_peak_2505	86.11
Chr3	18929823	18930335	MACS_peak_2506	1088.98
Chr3	18934412	18934740	MACS_peak_2507	295.95
Chr3	18938100	18938392	MACS_peak_2508	72.12
Chr3	18953005	18953440	MACS_peak_2509	230.88
Chr3	18974018	18974560	MACS_peak_2510	68.07
Chr3	19007744	19008339	MACS_peak_2511	252.32
Chr3	19040409	19040757	MACS_peak_2512	89.73
Chr3	19041129	19041990	MACS_peak_2513_MACS_peak_2514	69.1545
Chr3	19105867	19107267	MACS_peak_2515	733.06
Chr3	19116251	19116651	MACS_peak_2516	75.06
Chr3	19120011	19120312	MACS_peak_2517	55.98
Chr3	19122090	19122405	MACS_peak_2518	54.76
Chr3	19125558	19125900	MACS_peak_2519	56.65
Chr3	19151512	19151823	MACS_peak_2520	63.7
Chr3	19173794	19174414	MACS_peak_2521	124.96
Chr3	19190554	19190879	MACS_peak_2522	70.39
Chr3	19210188	19210806	MACS_peak_2523	145.1
Chr3	19243971	19244302	MACS_peak_2524	63.53
Chr3	19271675	19272585	MACS_peak_2525	104.4
Chr3	19284410	19287676	MACS_peak_2526_MACS_peak_2527	951.75
Chr3	19288058	19289063	MACS_peak_2528	1732.88
Chr3	19311253	19311944	MACS_peak_2529	220.67
Chr3	19315042	19317434	MACS_peak_2530_MACS_peak_2531	374.425
Chr3	19319361	19319882	MACS_peak_2532	62.91
Chr3	19330955	19331653	MACS_peak_2533	73.28
Chr3	19332142	19332551	MACS_peak_2534	59.19
Chr3	19417889	19418530	MACS_peak_2535	79.6
Chr3	19441072	19442280	MACS_peak_2536_MACS_peak_2537	967.488
Chr3	19446941	19447825	MACS_peak_2538	61.74
Chr3	19452421	19453192	MACS_peak_2539	99.75
Chr3	19458377	19458833	MACS_peak_2540	56.02
Chr3	19465661	19467096	MACS_peak_2541	2456.59
Chr3	19473587	19473917	MACS_peak_2542	59.04
Chr3	19475195	19475706	MACS_peak_2543	225.07
Chr3	19508056	19508903	MACS_peak_2544	136.85
Chr3	19510515	19511388	MACS_peak_2545	239.84
Chr3	19534641	19535749	MACS_peak_2546	526.78
Chr3	19570012	19570244	MACS_peak_2547	54.76
Chr3	19627506	19628475	MACS_peak_2549_MACS_peak_2550	115.017
Chr3	19639910	19640267	MACS_peak_2551	60.58
Chr3	19662261	19662507	MACS_peak_2552	52.97
Chr3	19695620	19695947	MACS_peak_2553	61.57
Chr3	19698390	19699174	MACS_peak_2554	294.45
Chr3	19745328	19745938	MACS_peak_2555	1705.41
Chr3	19766977	19767205	MACS_peak_2556	61.44
Chr3	19773087	19773330	MACS_peak_2557	50.69
Chr3	19789389	19791193	MACS_peak_2558_MACS_peak_2559_MACS_peak_2560	1670.99
Chr3	19804362	19804708	MACS_peak_2561	68.07
Chr3	19822543	19823044	MACS_peak_2562	157.62
Chr3	19841819	19842129	MACS_peak_2563	70.09
Chr3	19847974	19848849	MACS_peak_2564_MACS_peak_2565	117.597
Chr3	19868028	19868286	MACS_peak_2566	50.18
Chr3	19906286	19906800	MACS_peak_2567	82.5
Chr3	19909248	19909595	MACS_peak_2568	79.26
Chr3	19921637	19922182	MACS_peak_2569	142.52
Chr3	19933629	19934871	MACS_peak_2570	844.94
Chr3	19946186	19947332	MACS_peak_2571	235.1
Chr3	19973188	19973456	MACS_peak_2572	57.09
Chr3	19975584	19977012	MACS_peak_2573_MACS_peak_2574	223.351
Chr3	19996773	19997107	MACS_peak_2575	55.95
Chr3	20025376	20025636	MACS_peak_2576	58.63
Chr3	20065979	20066241	MACS_peak_2577	61.31
Chr3	20105363	20105688	MACS_peak_2578	135.77
Chr3	20136666	20136942	MACS_peak_2579	76.07
Chr3	20138372	20138744	MACS_peak_2580	119.52
Chr3	20228310	20229187	MACS_peak_2581	2334.63
Chr3	20244763	20245069	MACS_peak_2582	66.52
Chr3	20246652	20247151	MACS_peak_2583	220.11
Chr3	20248697	20249058	MACS_peak_2584	71.6
Chr3	20272960	20273205	MACS_peak_2585	59.16
Chr3	20322355	20322602	MACS_peak_2587	90.22
Chr3	20339975	20340325	MACS_peak_2588	106.43
Chr3	20359930	20360290	MACS_peak_2589	77.99
Chr3	20366240	20366841	MACS_peak_2590	149.9
Chr3	20396685	20396963	MACS_peak_2591	65.52
Chr3	20416622	20416969	MACS_peak_2592	54.12
Chr3	20417981	20418401	MACS_peak_2593	69.21
Chr3	20425251	20426089	MACS_peak_2594	707.3
Chr3	20434939	20435264	MACS_peak_2595	89.58
Chr3	20470948	20471285	MACS_peak_2596	78.89
Chr3	20471739	20472469	MACS_peak_2597	98.13
Chr3	20541903	20542115	MACS_peak_2598	53.08
Chr3	20605041	20605710	MACS_peak_2599	280.35
Chr3	20671320	20671660	MACS_peak_2600	81.72
Chr3	20673555	20673828	MACS_peak_2601	89.48
Chr3	20717593	20718517	MACS_peak_2602_MACS_peak_2603	245.016
Chr3	20754472	20754725	MACS_peak_2604	51.54
Chr3	20755672	20755944	MACS_peak_2605	78.66
Chr3	20785245	20785763	MACS_peak_2607	218.74
Chr3	20803544	20803846	MACS_peak_2608	195.32
Chr3	20817531	20818657	MACS_peak_2609	333.55
Chr3	20822413	20822951	MACS_peak_2610	110.44
Chr3	20835567	20835846	MACS_peak_2611	50.28
Chr3	20850161	20850382	MACS_peak_2612	110.84
Chr3	21018510	21019293	MACS_peak_2614_MACS_peak_2615	88.229
Chr3	21019797	21020124	MACS_peak_2616	76.14
Chr3	21043716	21043925	MACS_peak_2618	51.68
Chr3	21044584	21044930	MACS_peak_2619	91.32
Chr3	21054736	21054957	MACS_peak_2620	55.16
Chr3	21150922	21151565	MACS_peak_2621_MACS_peak_2622	58.599
Chr3	21155521	21155963	MACS_peak_2623	129.94
Chr3	21311378	21311823	MACS_peak_2624	147.28
Chr3	21320681	21321138	MACS_peak_2625	160.86
Chr3	21371089	21371547	MACS_peak_2626	442.03
Chr3	21404008	21404247	MACS_peak_2627	65.8
Chr3	21405521	21406082	MACS_peak_2629	160.85
Chr3	21406586	21406900	MACS_peak_2630	53.58
Chr3	21413700	21413914	MACS_peak_2631	100.44
Chr3	21415157	21415382	MACS_peak_2632	51.76
Chr3	21420137	21421223	MACS_peak_2634_MACS_peak_2635	200.19
Chr3	21421862	21422231	MACS_peak_2636	100.46
Chr3	21438151	21438681	MACS_peak_2637	102.3
Chr3	21442253	21442504	MACS_peak_2638	80.75
Chr3	21470182	21470403	MACS_peak_2639	62.15
Chr3	21516033	21516241	MACS_peak_2640	54.69
Chr3	21684938	21685912	MACS_peak_2642	176.92
Chr3	21711542	21712048	MACS_peak_2643_MACS_peak_2644	54.6736
Chr3	21783538	21783827	MACS_peak_2646	80.68
[truncated: 1,232 more rows]

## Sheet: ORI-TEs
CHR	START_INTERVAL	END_INTERVAL	MACS_NAME	TE_FAMILY	FAMILY_TE_VS_ORIS
Chr1	3332806	3332906	MACS_peak_159_MACS_peak_160	LINE-L1	YES
Chr1	5267181	5267281	MACS_peak_255_MACS_peak_256	Unassigned	YES
Chr1	12840736	12840836	MACS_peak_465_MACS_peak_466	Unassigned	YES
Chr1	12860310	12860410	MACS_peak_468	LINE-L1	YES
Chr1	12861017	12861117	MACS_peak_469	LINE-L1	YES
Chr1	13339323	13339423	MACS_peak_479	LTR-Gypsy	YES
Chr1	13777715	13777815	MACS_peak_484	LTR-Gypsy	YES
Chr1	13779157	13779257	MACS_peak_485	LTR-Gypsy	YES
Chr1	13944919	13945019	MACS_peak_487	LTR-Gypsy	YES
Chr1	13949792	13949892	MACS_peak_488_MACS_peak_489	LTR-Gypsy	YES
Chr1	14230092	14230192	MACS_peak_496_MACS_peak_497	LTR-Gypsy	YES
Chr1	14252107	14252207	MACS_peak_498_MACS_peak_499	LTR-Gypsy	YES
Chr1	14601428	14601528	MACS_peak_502_MACS_peak_503	LTR-Gypsy	YES
Chr1	15415347	15415447	MACS_peak_504	LTR-Gypsy	YES
Chr1	15580078	15580178	MACS_peak_506	LTR-Gypsy	YES
Chr1	15964216	15964316	MACS_peak_509	DNA-En-Spm	YES
Chr1	16316141	16316241	MACS_peak_516	Unassigned	YES
Chr1	16522326	16522426	MACS_peak_523	LTR-Gypsy	NON
Chr1	16588273	16588373	MACS_peak_527	LTR-Gypsy	YES
Chr1	16745508	16745608	MACS_peak_536	DNA-En-Spm	YES
Chr1	16854804	16854904	MACS_peak_539	LTR-Copia	YES
Chr1	17251849	17251949	MACS_peak_543	LTR-Copia	YES
Chr1	17474037	17474137	MACS_peak_546	LTR-Gypsy	YES
Chr1	18159932	18160032	MACS_peak_567_MACS_peak_568	DNA-En-Spm	YES
Chr1	18966103	18966203	MACS_peak_610_MACS_peak_611_MACS_peak_612	LTR-Gypsy	YES
Chr1	22104511	22104611	MACS_peak_679	LTR-Copia	YES
Chr1	23852014	23852114	MACS_peak_725	Unassigned	NON
Chr1	2071946	2072046	MACS_peak_75	Unassigned	NON
Chr1	30101176	30101276	MACS_peak_994	Unassigned	YES
Chr2	37316	37416	MACS_peak_1029	LTR-Gypsy	YES
Chr2	1310035	1310135	MACS_peak_1073	DNA-OTHER	YES
Chr2	1489778	1489878	MACS_peak_1080	LINE-L1	YES
Chr2	1547740	1547840	MACS_peak_1081	LTR-Copia	YES
Chr2	2378062	2378162	MACS_peak_1090_MACS_peak_1091	LTR-Gypsy	NON
Chr2	2380817	2380917	MACS_peak_1092	LTR-Gypsy	YES
Chr2	2393347	2393447	MACS_peak_1093	LTR-Gypsy	YES
Chr2	2395760	2395860	MACS_peak_1094_MACS_peak_1095	LTR-Gypsy	YES
Chr2	2404113	2404213	MACS_peak_1096	LTR-Gypsy	YES
Chr2	2420959	2421059	MACS_peak_1097_MACS_peak_1098_MACS_peak_1099_MACS_peak_1100_MACS_peak_1101_MACS_peak_1102_MACS_peak_1103	LTR-Gypsy	YES
Chr2	2483882	2483982	MACS_peak_1105	LINE-L1	YES
Chr2	2562188	2562288	MACS_peak_1106_MACS_peak_1107	LTR-Gypsy	YES
Chr2	2704320	2704420	MACS_peak_1112	LTR-Gypsy	YES
Chr2	2741588	2741688	MACS_peak_1113	LTR-Copia	YES
Chr2	2772131	2772231	MACS_peak_1114_MACS_peak_1115	DNA-MuDR	NON
Chr2	2772131	2772231	MACS_peak_1114_MACS_peak_1115	LTR-Gypsy	NON
Chr2	2775664	2775764	MACS_peak_1116	DNA-MuDR	NON
Chr2	2781167	2781267	MACS_peak_1117	LTR-Copia	YES
Chr2	2791286	2791386	MACS_peak_1118	LTR-Gypsy	YES
Chr2	2813107	2813207	MACS_peak_1124	LTR-Gypsy	YES	INCLUDES 2 GYPSY ELEMENTS
Chr2	2873067	2873167	MACS_peak_1128	LTR-Gypsy	YES
Chr2	2876046	2876146	MACS_peak_1129	LTR-Gypsy	YES
Chr2	2879558	2879658	MACS_peak_1130	LTR-Gypsy	YES
Chr2	2933076	2933176	MACS_peak_1131	LINE-L1	YES
Chr2	3001458	3001558	MACS_peak_1133	DNA-MuDR	YES
Chr2	3004129	3004229	MACS_peak_1134	DNA-MuDR	YES
Chr2	3459104	3459204	MACS_peak_1244_MACS_peak_1245	LTR-Copia	YES
Chr2	3537477	3537577	MACS_peak_1286	LTR-Gypsy	YES
Chr2	3569034	3569134	MACS_peak_1287	LINE-L1	YES
Chr2	3761721	3761821	MACS_peak_1290	LTR-Gypsy	YES
Chr2	3823690	3823790	MACS_peak_1291	LTR-Copia	YES
Chr2	3944238	3944338	MACS_peak_1292	LTR-Gypsy	YES
Chr2	3974657	3974757	MACS_peak_1293	LTR-Gypsy	YES
Chr2	3980051	3980151	MACS_peak_1294_MACS_peak_1295	LTR-Gypsy	YES	INCLUDES 2 GYPSY ELEMENTS
Chr2	3983796	3983896	MACS_peak_1296	LTR-Gypsy	NON
Chr2	4124133	4124233	MACS_peak_1297	LTR-Gypsy	YES
Chr2	4178719	4178819	MACS_peak_1298	LTR-Gypsy	YES
Chr2	4283803	4283903	MACS_peak_1299	DNA-MuDR	YES
Chr2	4294061	4294161	MACS_peak_1300	LINE-L1	YES
Chr2	4739624	4739724	MACS_peak_1303	LTR-Gypsy	YES
Chr2	4741077	4741177	MACS_peak_1305	LTR-Gypsy	YES
Chr2	4895747	4895847	MACS_peak_1307	LINE-L1	YES
Chr2	5105773	5105873	MACS_peak_1311	LTR-Gypsy	YES
Chr2	5298938	5299038	MACS_peak_1313	LTR-Gypsy	YES
Chr2	5302123	5302223	MACS_peak_1314	LTR-Gypsy	YES
Chr2	5366466	5366566	MACS_peak_1316	LTR-Gypsy	YES
Chr2	5381278	5381378	MACS_peak_1317_MACS_peak_1318	LTR-Gypsy	YES
Chr2	5383544	5383644	MACS_peak_1319_MACS_peak_1320	LTR-Gypsy	YES
Chr2	5783371	5783471	MACS_peak_1321	LTR-Gypsy	YES
Chr2	6031912	6032012	MACS_peak_1322	LTR-Copia	YES
Chr2	6529781	6529881	MACS_peak_1326	DNA-En-Spm	NON
Chr2	6846744	6846844	MACS_peak_1339	Unassigned	YES
Chr2	6863410	6863510	MACS_peak_1340	LINE-L1	YES
Chr2	7114784	7114884	MACS_peak_1343	LINE-L1	YES
Chr2	7117729	7117829	MACS_peak_1344	LINE-L1	YES
Chr2	7225704	7225804	MACS_peak_1356_MACS_peak_1357	LTR-Copia	YES
Chr2	10490918	10491018	MACS_peak_1469	LTR-Copia	YES
Chr2	14931672	14931772	MACS_peak_1578_MACS_peak_1579	LTR-Copia	YES
Chr3	4968361	4968461	MACS_peak_2127_MACS_peak_2128	Unassigned	YES
Chr3	4970245	4970345	MACS_peak_2129	Unassigned	YES
Chr3	5838037	5838137	MACS_peak_2179	DNA-MuDR	YES
Chr3	11560087	11560187	MACS_peak_2347	LINE-L1	YES
Chr3	12185588	12185688	MACS_peak_2350	DNA-MuDR	NON
Chr3	12695079	12695179	MACS_peak_2351	LTR-Gypsy	YES
Chr3	12804349	12804449	MACS_peak_2353	RC-Helitron	NON
Chr3	12804349	12804449	MACS_peak_2353	Unassigned	NON
Chr3	12821106	12821206	MACS_peak_2354	LINE-L1	YES
Chr3	12862874	12862974	MACS_peak_2357	LINE-L1	NON
Chr3	12924159	12924259	MACS_peak_2358	DNA-En-Spm	YES
Chr3	12936199	12936299	MACS_peak_2359	LTR-Gypsy	YES
Chr3	13099537	13099637	MACS_peak_2360	LINE-L1	YES
Chr3	13394458	13394558	MACS_peak_2362	LTR-Gypsy	YES
Chr3	14162594	14162694	MACS_peak_2367	LTR-Gypsy	YES
Chr3	14167914	14168014	MACS_peak_2368	LTR-Gypsy	YES
Chr3	14799117	14799217	MACS_peak_2389	LTR-Gypsy	YES
Chr3	15268714	15268814	MACS_peak_2396	DNA-En-Spm	YES
Chr3	15559330	15559430	MACS_peak_2398	LTR-Gypsy	YES
Chr3	15599012	15599112	MACS_peak_2400_MACS_peak_2401	Unassigned	YES
Chr3	15813582	15813682	MACS_peak_2402	Unassigned	NON
Chr3	16175574	16175674	MACS_peak_2406	LINE-L1	YES
Chr3	16591394	16591494	MACS_peak_2416	LINE-L1	YES
Chr4	321256	321356	MACS_peak_2800	LINE-L1	YES
Chr4	633726	633826	MACS_peak_2827_MACS_peak_2828_MACS_peak_2829	LINE-L1	YES
Chr4	648388	648488	MACS_peak_2830	LINE-L1	YES
Chr4	735547	735647	MACS_peak_2836	SINE	YES
Chr4	1316218	1316318	MACS_peak_2867_MACS_peak_2868	LTR-Copia	YES
Chr4	1923512	1923612	MACS_peak_2876	LINE-L1	YES
Chr4	2003402	2003502	MACS_peak_2878	LTR-Gypsy	YES
Chr4	2006055	2006155	MACS_peak_2879	LTR-Gypsy	YES
Chr4	2009245	2009345	MACS_peak_2880	LTR-Gypsy	YES
Chr4	2173186	2173286	MACS_peak_2881	LINE-L1	YES
Chr4	3787943	3788043	MACS_peak_2892	LTR-Gypsy	YES
Chr4	3796476	3796576	MACS_peak_2893	LINE-L1	YES
Chr4	3825460	3825560	MACS_peak_2894_MACS_peak_2895	DNA-En-Spm	YES
Chr4	3903206	3903306	MACS_peak_2896	LTR-Gypsy	YES
Chr4	3910095	3910195	MACS_peak_2897_MACS_peak_2898	LTR-Copia	YES
Chr4	3913214	3913314	MACS_peak_2899	LTR-Copia	YES
Chr4	4021699	4021799	MACS_peak_2903	LTR-Gypsy	YES
Chr4	5026025	5026125	MACS_peak_2910	LTR-Gypsy	YES
Chr4	5205893	5205993	MACS_peak_2912	LINE-L1	YES
Chr4	5336018	5336118	MACS_peak_2914	LTR-Gypsy	YES
Chr4	5594941	5595041	MACS_peak_2921	LTR-Copia	YES
Chr4	6201514	6201614	MACS_peak_2928	LINE-L1	YES
Chr4	7276629	7276729	MACS_peak_2941	LINE-L1	YES
Chr4	7559459	7559559	MACS_peak_2949	LTR-Gypsy	YES
Chr4	9062801	9062901	MACS_peak_2974	LTR-Gypsy	YES
Chr4	10996365	10996465	MACS_peak_3017	LTR-Copia	YES
Chr4	11037536	11037636	MACS_peak_3020_MACS_peak_3021	LTR-Gypsy	YES
Chr4	11407187	11407287	MACS_peak_3029	Unassigned	YES
Chr4	13627933	13628033	MACS_peak_3096	LTR-Copia	YES
Chr5	4403196	4403296	MACS_peak_3514	LINE-L1	YES
Chr5	4564011	4564111	MACS_peak_3536	LINE-L1	YES
Chr5	6351310	6351410	MACS_peak_3628	DNA-En-Spm	YES
Chr5	6407686	6407786	MACS_peak_3632	LTR-Copia	YES
Chr5	9252176	9252276	MACS_peak_3747	DNA-MuDR	YES
Chr5	9562192	9562292	MACS_peak_3755	DNA-MuDR	NON
Chr5	9957316	9957416	MACS_peak_3763	Unassigned	YES
Chr5	10050489	10050589	MACS_peak_3765	LINE-L1	YES	INCLUDES 2 LINE-L1 ELEMENTS
Chr5	10055368	10055468	MACS_peak_3766	LINE-L1	YES
Chr5	10639626	10639726	MACS_peak_3769	LTR-Copia	YES
Chr5	11202168	11202268	MACS_peak_3773	LTR-Gypsy	NON
Chr5	11627680	11627780	MACS_peak_3776	DNA-En-Spm	NON
Chr5	11627680	11627780	MACS_peak_3776	LTR-Copia	NON
Chr5	12191335	12191435	MACS_peak_3783	LTR-Gypsy	YES
Chr5	12756056	12756156	MACS_peak_3787	LTR-Gypsy	YES
Chr5	12757530	12757630	MACS_peak_3788_MACS_peak_3789	LTR-Gypsy	YES
Chr5	12760697	12760797	MACS_peak_3790	LTR-Gypsy	YES
Chr5	12764113	12764213	MACS_peak_3791	LTR-Gypsy	YES
Chr5	12995877	12995977	MACS_peak_3793	LTR-Gypsy	YES
Chr5	13181131	13181231	MACS_peak_3797	LTR-Gypsy	YES
Chr5	13714147	13714247	MACS_peak_3803	LINE-L1	YES
Chr5	13716136	13716236	MACS_peak_3804_MACS_peak_3805	LINE-L1	YES
Chr5	13782710	13782810	MACS_peak_3810_MACS_peak_3811	LTR-Gypsy	YES
Chr5	13949794	13949894	MACS_peak_3814_MACS_peak_3815	LTR-Copia	YES
Chr5	19174912	19175012	MACS_peak_3925_MACS_peak_3926	LINE-L1	YES
